# Supplementary material for: Single-atom copper catalyst for the S-arylation reaction to produce diaryl disulfides
Source: Royal Society of Chemistry journal article supplement (doi:10.1039/d2sc06738b), 2023-01-01
Supplement: d2sc06738b1.pdf [file d2sc06738b1.pdf]

## ***Supplementary Information***

### **Single Atom Copper Catalyst for S-arylation Reaction to Produce Diaryl Disulfides**

Yiming Zhao,<sup>a</sup> Yan Zhou,<sup>a</sup> Shanshan Lv,<sup>a</sup> Han Li,<sup>a</sup> Qikang Wu,<sup>a</sup> Shaohuan Liu,<sup>a</sup>  
Wanying Li,<sup>a</sup> Taiyu Chen,<sup>a</sup> Zheng Chen<sup>\*a</sup>

<sup>a</sup>Key Laboratory of Functional Molecular Solids, Ministry of Education, Anhui Laboratory of  
Molecule-Based Materials, College of Chemistry and Materials Science, Anhui Normal University,  
Wuhu, Anhui 241000, China

## **Experiment Methods**

### **Chemicals**

Copper(II) Chloride Dihydrate [ $\text{CuCl}_2 \cdot 2\text{H}_2\text{O}$ ], Cerium(III) Nitrate Hexahydrate and Sodium Hydroxide were purchased from Sinopharm Chemical Reagent Co. Ltd. (Shanghai, China).  $\text{Ar}/\text{H}_2$  (5%) was purchased from Linde Gas. The water used in all experiments was ultrapure (18.2 M $\Omega$ ). All chemicals were used as received without further purification.

### **Synthesis of $\text{CeO}_x$ Nanorods**

5 mL 0.8 M  $\text{Ce}(\text{NO}_3)_4$  and 75 mL 6.4 M NaOH put together into a 200 mL Beaker, then dissolved in r.t. for 0.5 h and then transferred into a Teflon bottle. The Teflon bottle was tightly sealed and hydrothermally treated in a stainless-steel autoclave at 100 °C for 24 h. The separated solid was heated under air at 2 °C min<sup>-1</sup> (2.5 h) up to 300 °C and then treated at 300 °C for 2h. The yellow and fluffy powder is obtained after the temperature dropped.

### **Synthesis of $\text{Cu}_1/\text{CeO}_x$ nanorods**

5 mL  $\text{CuCl}_2$  (0.01g mL<sup>-1</sup>) was added into the  $\text{CeO}_x$  aqueous dispersion (500 mg  $\text{CeO}_x$  dispersed in 50 mL of distilled water) and keeping stirring at 50 °C for 12 h. The resulting product was washed with distilled water several times, and was then dried in vacuum at 50 °C overnight to give  $\text{CuCl}_2/\text{CeO}_2$  sample, followed by annealing at 150 °C in  $\text{H}_2/\text{Ar}$  (5%) atmosphere for 2 h to give  $\text{Cu}_1/\text{CeO}_x$  sample.

### **Synthesis of $\text{Cu}_{1+x}/\text{CeO}_x$ nanorods (1% Cu species)**

10 mL  $\text{CuCl}_2$  (0.01g mL<sup>-1</sup>) was added into the  $\text{CeO}_x$  aqueous dispersion (500 mg  $\text{CeO}_x$  dispersed in 45 mL of distilled water) and keeping stirring at 50 °C for 12 h. The resulting product evaporated under vacuum, and was then dried in vacuum at 50 °C overnight to give  $\text{CuCl}_2/\text{CeO}_2$  sample, followed by annealing at 150 °C in  $\text{H}_2/\text{Ar}$  (5%) atmosphere for 2 h to give  $\text{Cu}_1/\text{CeO}_x$  sample.

### **Synthesis of $\text{Cu}_{1+x}/\text{CeO}_x$ nanorods (2% Cu species)**

20 mL  $\text{CuCl}_2$  ( $0.01 \text{ g mL}^{-1}$ ) was added into the  $\text{CeO}_x$  aqueous dispersion (500 mg  $\text{CeO}_x$  dispersed in 35 mL of distilled water) and keeping stirring at  $50^\circ\text{C}$  for 12 h. The resulting product evaporated under vacuum, and was then dried in vacuum at  $50^\circ\text{C}$  overnight to give  $\text{CuCl}_2/\text{CeO}_2$  sample, followed by annealing at  $150^\circ\text{C}$  in  $\text{H}_2/\text{Ar}$  (5%) atmosphere for 2 h to give  $\text{Cu}_1/\text{CeO}_x$  sample.

### Procedure for dithiolation of aryl iodides

In a typical reaction, a 10 mL Schlenk tube was charged with iodobenzene (102.0 mg, 0.5 mmol), 0.75 mmol elemental sulfur (24.0 mg, 1.5 equiv., 0.75 mmol), NaOH (80.0 mg, 4.0 equiv., 2 mmol) and 20 mg  $\text{Cu}_1/\text{CeO}_x$  catalyst and 2 mL DMF under nitrogen atmosphere. After stirring the result mixture under specific temperature and time, the catalyst was removed through centrifugation. GC-FID (SP-6890) and GC-MS was used to determine the conversion and selectivity. Then the mixture was cooled and then poured into 5 mL saturated  $\text{NH}_4\text{Cl}$  solution, extracted with ethyl acetate (3 x 10 mL), and washed with water (3 x 10 mL). The combined organic layers were dried over anhydrous  $\text{Na}_2\text{SO}_4$ . The residue was purified by flash column chromatography on silica gel use petroleum ether to afford the desired product **2a**.

### Recycling studies

In a typical reaction, a 10 mL Schlenk tube was charged with iodobenzene (102.0 mg, 0.5 mmol), 0.75 mmol elemental sulfur (24.0 mg, 1.5 equiv., 0.75 mmol), NaOH (80.0 mg, 4.0 equiv., 2 mmol) and 60 mg  $\text{Cu}/\text{CeO}_x$  catalyst and 2 mL DMF under nitrogen atmosphere. After stirring the result mixture under specific temperature and time, the catalyst was removed through centrifugation. GC-FID (SP-6890) and GC-MS was used to determine the conversion and selectivity. After reaction, the catalyst was separated through centrifugation and the catalyst was washed with ethyl acetate, methanol, 0.1 mol/L HCl, DDI water successively. And then dried in a vacuum oven at  $60^\circ\text{C}$  for 3 hours, and reused in a next run.

### Characterization

The crystalline structure and phase purity were determined by Rigaku RU-200b X-ray powder diffractometer with Cu Ka radiation ( $\lambda = 1.5418 \text{ \AA}$ ). The size and morphology

of as-synthesized samples were determined by using Hitachi-7700 transmission electron microscope working at 100 kV. The high-angle annular dark-field scanning TEM (HAADF-STEM) were operated at 200 kV by a JEOL-ARM200F. The composition of the product was measured by the inductively coupled plasma-atomic emission spectrometry and energy dispersive X-ray spectrometer. Inductively Coupled Plasma Optical Emission Spectrometer (ICP-OES) results were obtained in Agilent 720ES.

Photoemission spectroscopy experiments (XPS) were performed on a ULVAC PHI Quantera microprobe in Beijing, China. The end station is comprised of four ultrahigh vacuum (UHV) chambers including analysis chamber, preparation chamber, molecular beam epitaxy (MBE) chamber, and a radial distribution chamber (RDC). The base pressures are  $7 \times 10^{-11}$ ,  $1 \times 10^{-10}$ ,  $5 \times 10^{-10}$  and  $2 \times 10^{-11}$  mbar, respectively. In addition, a quick sample load-lock system is attached to the RDC. The analysis chamber is equipped with a VG Scienta R4000 analyzer and a monochromatic Al K $\alpha$  X-ray source. The sample was annealed at the preparation chamber and then transferred to the analysis chamber for characterization. The core-level spectra were measured using a monochromatic Al K $\alpha$  X-ray source. For the core-level spectra, the binding energies were calibrated using the C 1s feature located at 284.6 eV as the reference.

### **X-ray absorption data collection and analysis**

The Cu K-edge X-ray absorption spectra were collected at room temperature in fluorescence mode at beamline 1W1B of Beijing Synchrotron Radiation Facility (BSRF) using a Si (111) double-crystal monochromator. The storage rings of BSRF were operated at 2.5 GeV with a maximum current of 250 mA in decay mode. The energy was calibrated using Cu foil, while the incident and fluorescence x-ray intensities were monitored by using standard 25% Ar and 75% N<sub>2</sub>-filled ion chamber and Ar-filled Lytle-type detector, respectively. A detuning of about 20% by misaligning the silicon crystals was also performed to suppress the high harmonic content. The samples were pelletized as disks of 13 mm diameter with 1mm thickness before measurements.

The XAFS raw data were background-subtracted, normalized, and Fourier transformed by the standard procedures with the ATHENA program. To obtain the quantitative structural parameters around the absorbing Cu atoms, least-squares curve fitting analysis of the EXAFS  $\chi(k)$  data was performed using the ARTEMIS package, with the theoretical scattering amplitudes, phase shifts and the photoelectron mean free path for all paths calculated by FEFF6.

The following EXAFS equation was used:

$$\chi(k) = \sum_j \frac{N_j S_0^2 F_j(k)}{k R_j^2} \exp[-2 K^2 \sigma_j^2] \exp\left[-\frac{2 R_j}{\lambda(k)}\right] \sin[2k R_j + \phi_j(k)]$$

where  $S_0^2$  is the amplitude reduction factor,  $F_j(k)$  is the effective curved-wave backscattering amplitude,  $N_j$  is the number of neighbors in the  $j^{\text{th}}$  atomic shell,  $R_j$  is the distance between the X-ray absorbing central atom and the atoms in the  $j^{\text{th}}$  atomic shell (backscatterer),  $\lambda$  is the mean free path in Å,  $\phi_j(k)$  is the phase shift (including the phase shift for each shell and the total central atom phase shift),  $\sigma_j$  is the Debye-Waller parameter of the  $j^{\text{th}}$  atomic shell (variation of distances around the average  $R_j$ ). In present work, the variable parameters that are determined by using the EXAFS equation to fit the experimental data include  $N$ ,  $R$ , and the EXAFS Debye-Waller factor ( $\sigma^2$ ).  $S_0^2$  was determined in the fit of Cu standard to be 0.85, and used as fixed value in the rest of the EXAFS models. All fits were performed in the  $R$  space with  $k$ -weight of 3. The EXAFS  $R$ -factor ( $R_f$ ) that measures the percentage misfit of the theory to the data was used to evaluate the goodness of the fit.

## **N<sub>2</sub>O titration tests**

The dispersion test of copper was carried out on the TP 5080 adsorption-desorption instrument (Xianquan Industrial and Trading Co. Ltd., China) with a thermal conductivity cell by the N<sub>2</sub>O titration method. The catalyst is loaded into a customized quartz reaction tube, and then the catalyst is preheated from 20 °C to 230 °C at 10 °C/min under 10% hydrogen/nitrogen (30 ml/min) atmosphere, then purged with argon (30 ml/min) at 230 °C for 30 min to remove excess hydrogen. Then use 10% CO<sub>2</sub>/Ar to oxidize the Ce<sup>3+</sup> obtained from pretreatment reduction at 40 °C to Ce<sup>4+</sup> for 15 min. After the sample is cooled and kept at 50 °C, pure N<sub>2</sub>O was pulsed into the reaction tube

through a six-way valve with 50  $\mu\text{L}$  or 100  $\mu\text{L}$ . The amount of  $\text{N}_2\text{O}$  consumed can be obtained, and the final exposed metal copper can be calculated based on  $n_{\text{Cu}0}/n_{\text{N}_2\text{O}} = 2$ .

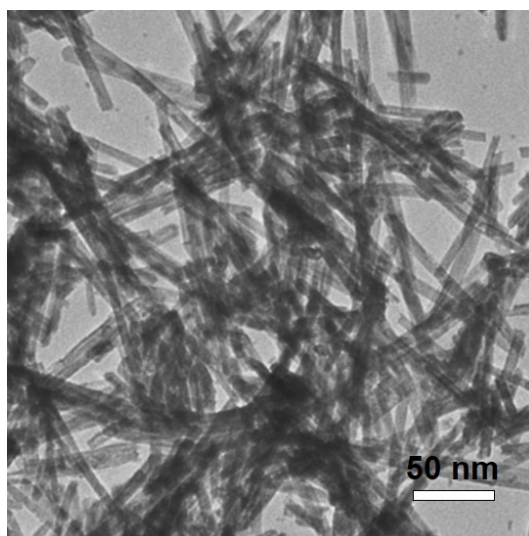

**Figure S1.** The representative TEM image of  $\text{CeO}_x$  nanorods.

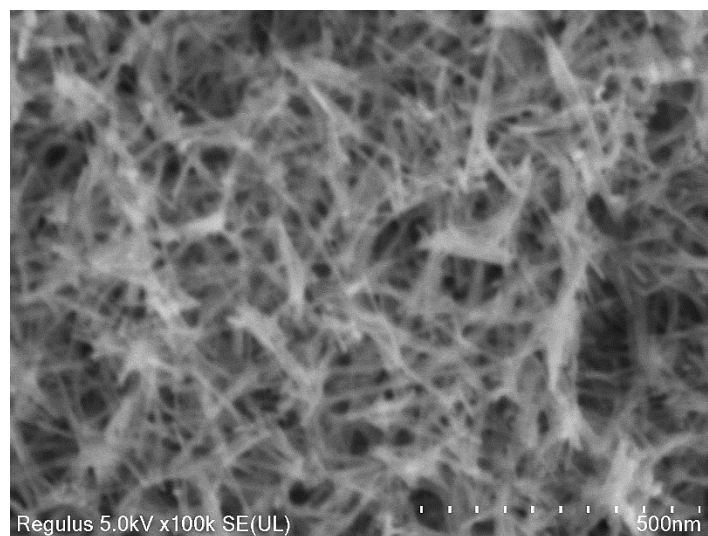

**Figure S2.** The representative SEM image of  $\text{Cu}_1/\text{CeO}_x$  nanorods.

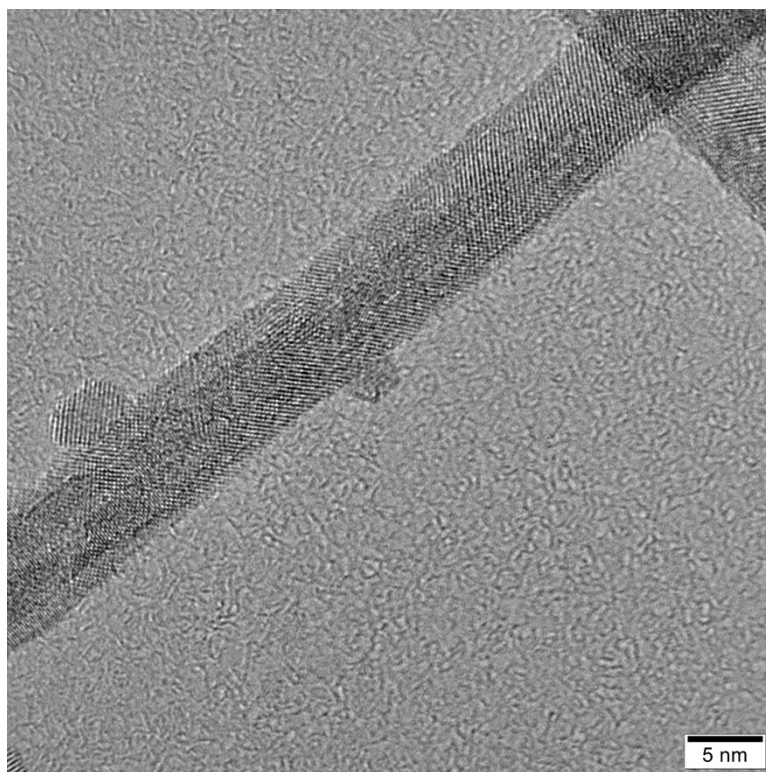

**Figure S3.** The representative TEM image of 1% Cu/CeO<sub>x</sub> .

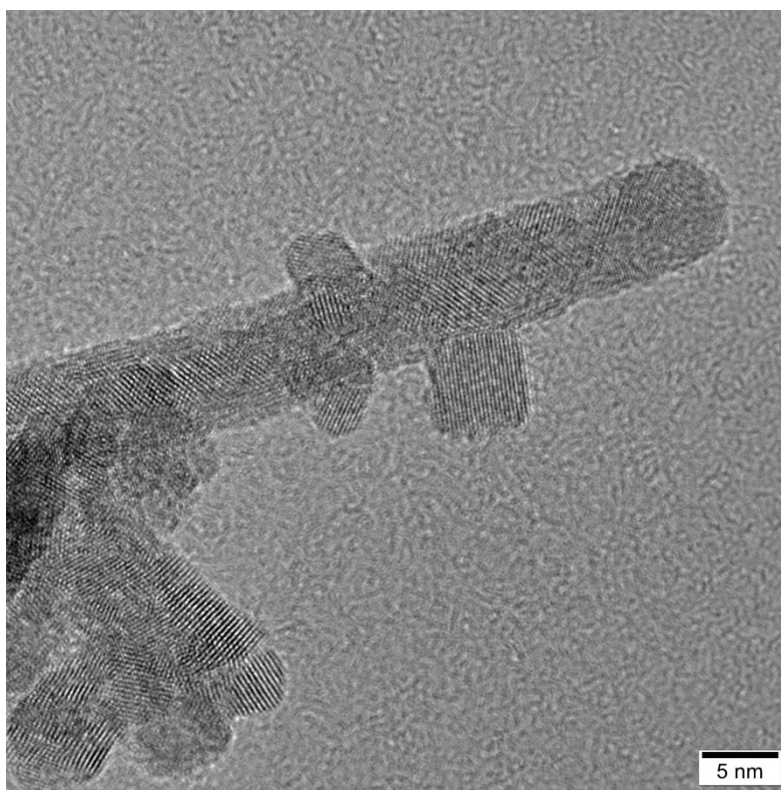

**Figure S4.** The representative TEM image of 2% Cu/CeO<sub>x</sub> .

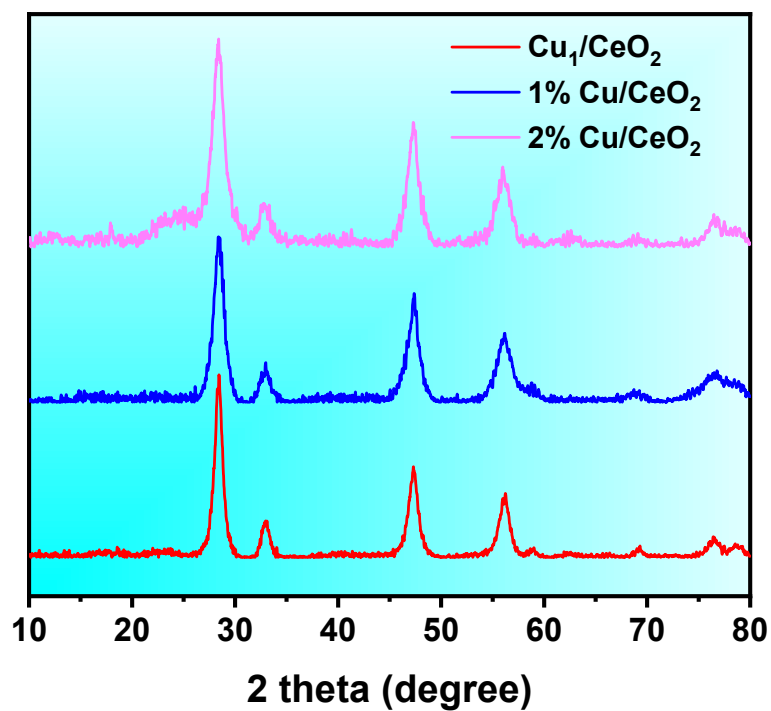

**Figure S5.** The Comparison between the XRD patterns for original  $\text{Cu}_1/\text{CeO}_x$ , 1%  $\text{Cu}/\text{CeO}_x$  and 2%  $\text{Cu}/\text{CeO}_x$  catalysts.

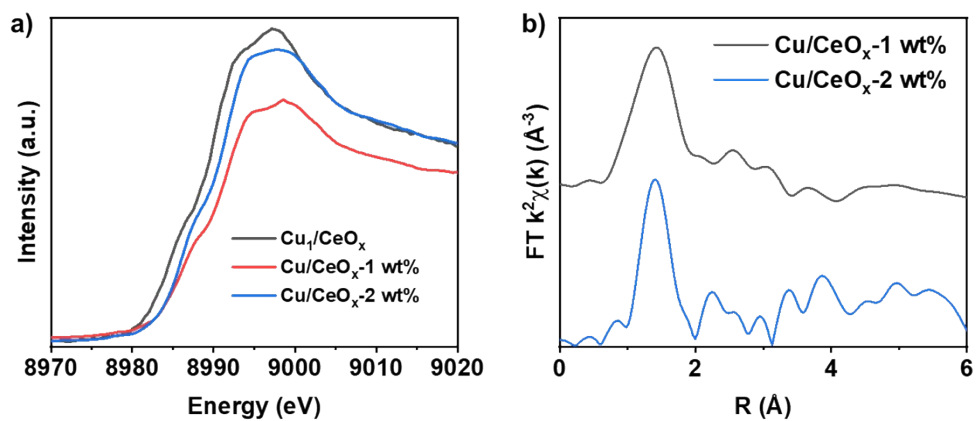

**Figure S6.** a) XANES spectra at the Cu K-edge of Cu<sub>1</sub>/CeO<sub>x</sub>, Cu/CeO<sub>x</sub>-1 wt% and Cu/CeO<sub>x</sub>-2 wt%; b) FT EXAFS spectra of Cu/CeO<sub>x</sub>-1 wt% and Cu/CeO<sub>x</sub>-2 wt%.

**Table S1.** N<sub>2</sub>O titration test results for Cu species.

| Sample                            | ICP-OES results<br>for Cu species | Calculated Isolated Cu<br>species | Dispersion<br>of Cu<br>species<br>(%) |
|-----------------------------------|-----------------------------------|-----------------------------------|---------------------------------------|
| Cu <sub>I</sub> /CeO <sub>x</sub> | 0.138 mg                          | 0.160 mg                          | >99%                                  |
| 1% Cu/CeO <sub>x</sub>            | 0.205 mg                          | 0.196 mg                          | 95.6%                                 |
| 2% Cu/CeO <sub>x</sub>            | 0.413 mg                          | 0.372 mg                          | 90.1%                                 |

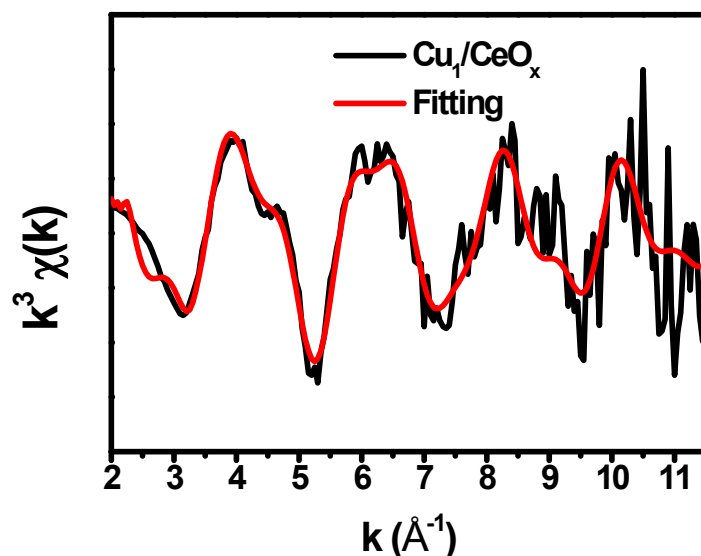

**Figure S7.** EXAFS fitting curves of the Cu<sub>I</sub>/CeO<sub>x</sub> in  $k$  space.

**Table S2.** Structural parameters extracted from the EXAFS fitting. ( $S_0^2 = 0.85$ )

| Sample                            | Scattering pair | CN  | R(Å) | $\sigma^2(10^{-3}\text{Å}^2)$ | $\Delta E_0(\text{eV})$ | R factor |
|-----------------------------------|-----------------|-----|------|-------------------------------|-------------------------|----------|
| Cu <sub>I</sub> /CeO <sub>x</sub> | Cu-O            | 4.1 | 1.80 | 0.0046                        | -2.5                    | 0.0033   |
|                                   | Cu-O            | 1.1 | 2.54 | 0.0002                        | -3.4                    | 0.026    |
|                                   | Cu-Ce           | 3.9 | 3.17 | 0.0139                        | -4.7                    | 0.031    |

$S_0^2$  is the amplitude reduction factor; CN is the coordination number; R is interatomic distance (the bond length between Cu central atoms and surrounding coordination atoms);  $\sigma^2$  is Debye-Waller factor (a measure of thermal and static disorder in absorber-scatterer distances);  $\Delta E_0$  is edge-energy shift (the difference between the zero kinetic energy value of the sample and that of the theoretical model). R factor is used to value the goodness of the fitting.

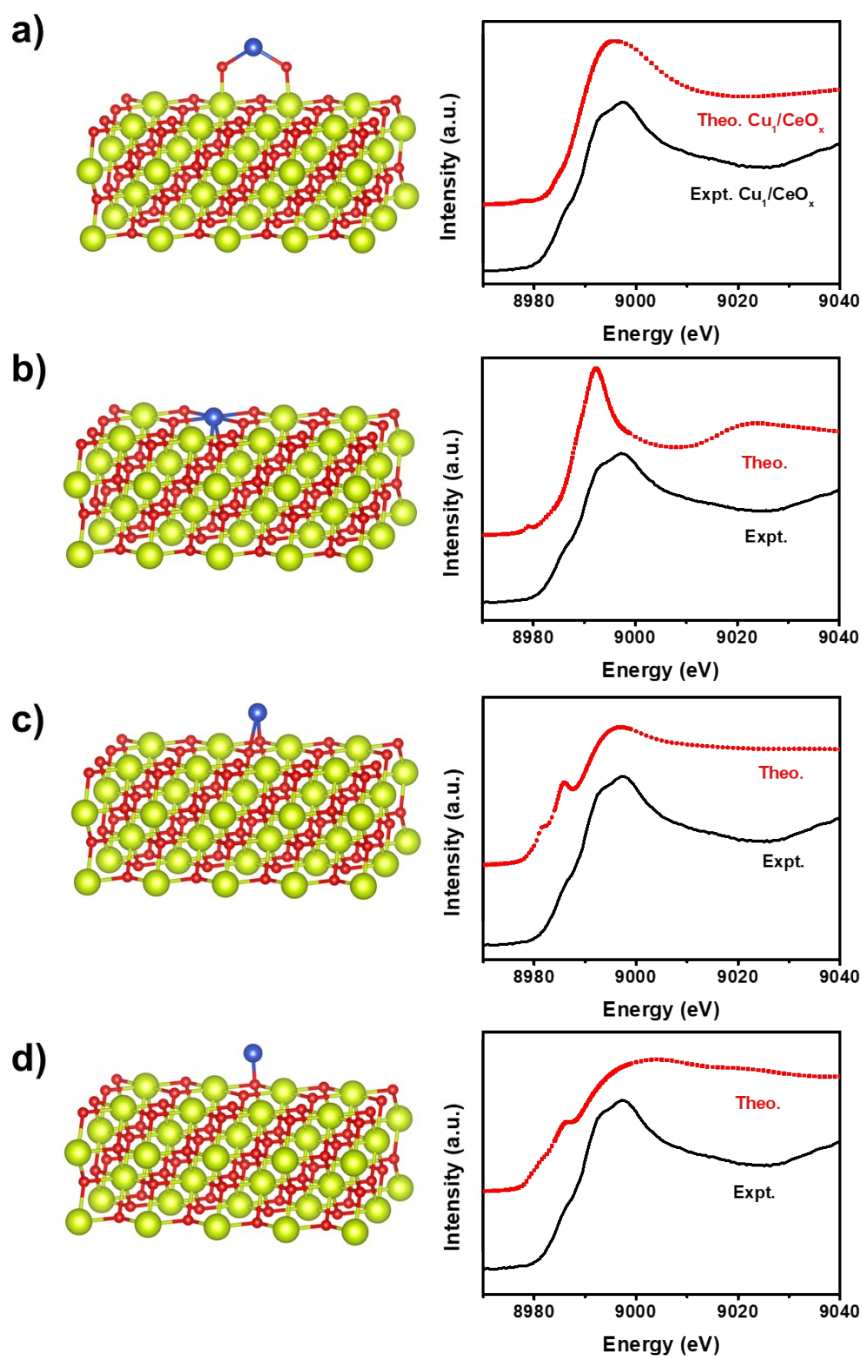

**Figure S8.** Comparison between the experimental Cu K-edge XANES spectra of  $\text{Cu}_1/\text{CeO}_x$  and the theoretical spectra of four different structures. The red, yellow and blue balls refer to O, Ce, and Cu atoms, respectively.

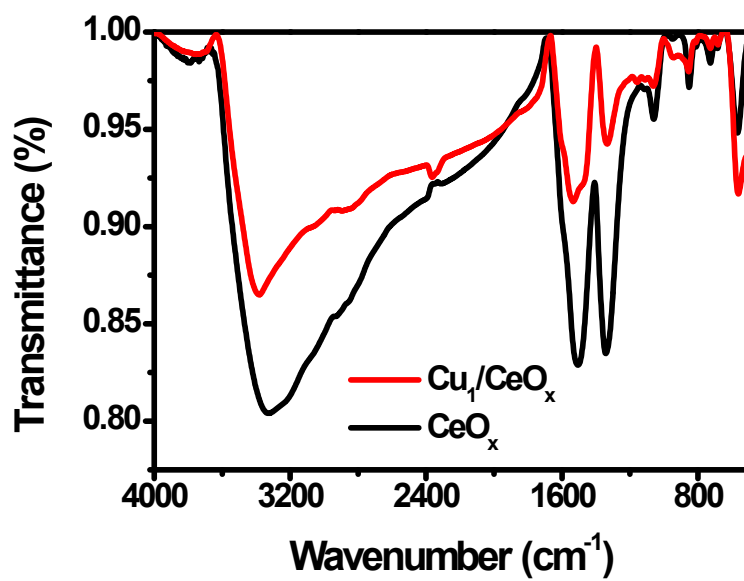

**Figure S9.** Infrared spectrum of CeO<sub>x</sub> and Cu<sub>1</sub>/CeO<sub>x</sub> samples.

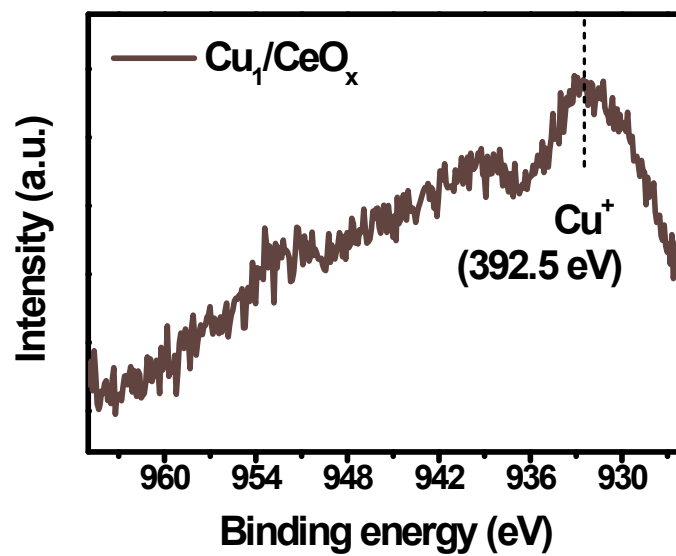

**Figure S10.** High-resolution spectra of Cu 2p in  $\text{Cu}_1/\text{CeO}_x$  sample.

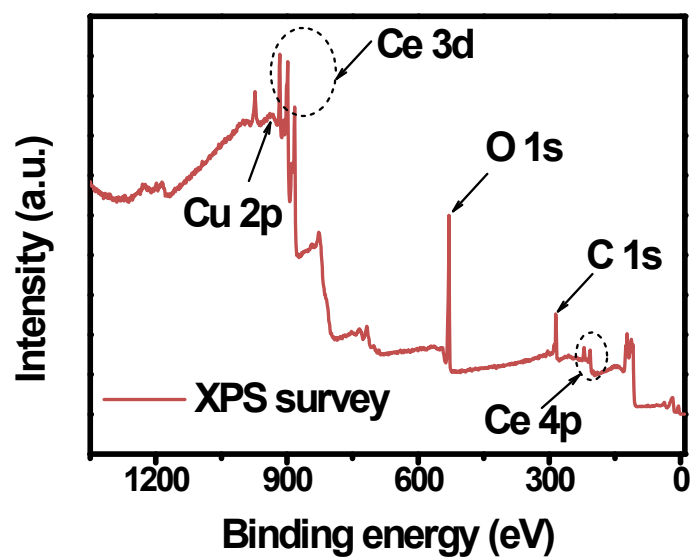

**Figure S11.** XPS spectra of  $\text{Cu}_1/\text{CeO}_x$  sample.

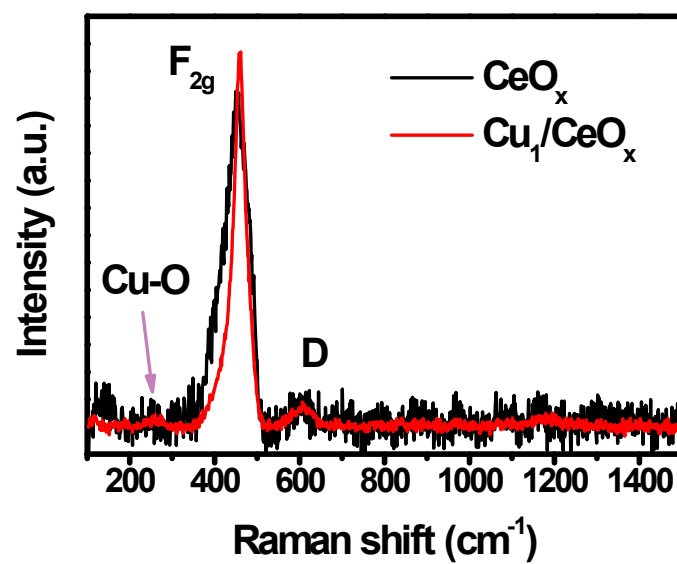

**Figure S12.** Raman spectra (lex = 532 nm) of  $\text{CeO}_x$  and  $\text{Cu}_1/\text{CeO}_x$  samples.

**Table S3.** The solvents optimization for dithiolation reaction of Iodobenzene.<sup>a</sup>

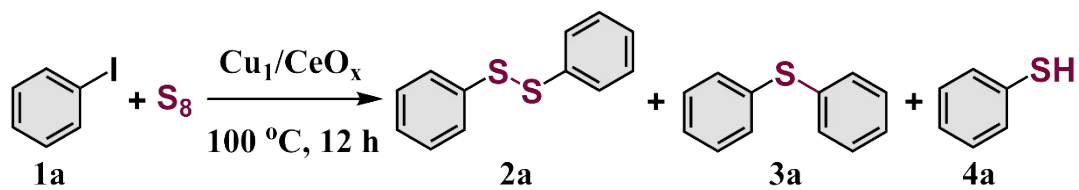

| Entry | Solvent               | Con. (%) | Sel. (%) |      |      |
|-------|-----------------------|----------|----------|------|------|
|       |                       |          | 2a       | 3a   | 4a   |
| 1     | MeCN                  | -        | -        | -    | -    |
| 2     | Toluene               | -        | -        | -    | -    |
| 3     | NMP                   | -        | -        | -    | -    |
| 4     | DMAc                  | 24.5     | 11.1     | 50.3 | 38.6 |
| 5     | HMPA                  | -        | -        | -    | -    |
| 6     | n-butanol             | -        | -        | -    | -    |
| 7     | DMF                   | 68.8     | 85.4     | 0    | 14.6 |
| 9     | DMF + 0.02 mL $H_2O$  | 81.2     | 90.7     | 0    | 9.3  |
| 10    | DMF + 0.067 mL $H_2O$ | 82.6     | 97.4     | 2.1  | 0.52 |
| 11    | DMF + 0.2 mL $H_2O$   | 81.5     | 90.0     | 0    | 10.0 |
| 12    | DMF + 0.67 mL $H_2O$  | 41.6     | 93.7     | 0    | 3.3  |
| 13    | DMF + 2 mL $H_2O$     | -        | -        | -    | -    |

<sup>a</sup> Reaction conditions: iodobenzene (0.5 mmol),  $S_8$  (24 mg), NaOH (80 mg),  $CuI/CeO_x$  (20 mg), in Ar for 12 h.

**Table S4.** The bases optimization for dithiolation reaction of Iodobenzene.<sup>a</sup>

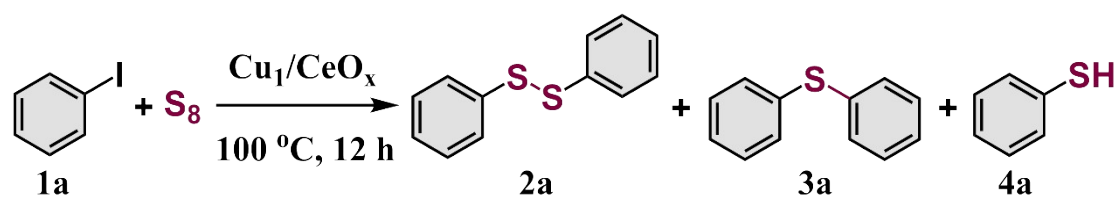

| Entry | Base                            | Con. (%) | Sel. (%) |     |      |
|-------|---------------------------------|----------|----------|-----|------|
|       |                                 |          | 2a       | 3a  | 4a   |
| 1     | NaOH                            | 82.6     | 97.4     |     |      |
| 2     | KOH                             | 83.3     | 95.7     | 2.1 | 2.2  |
| 3     | CsOH                            | 66.1     | 86.9     | 0   | 13.1 |
| 4     | t-BuOK                          | 10.4     | 67.3     | 9.8 | 22.9 |
| 5     | K <sub>2</sub> CO <sub>3</sub>  | 57.2     | 90.3     | 0.8 | 8.9  |
| 6     | Na <sub>2</sub> CO <sub>3</sub> | 46.8     | 86.1     | 0.9 | 13.0 |
| 7     | Cs <sub>2</sub> CO <sub>3</sub> | 12.4     | 78.9     | 0   | 21.1 |
| 8     | NaHCO <sub>3</sub>              | 51.3     | 92.0     | 0   | 8.0  |
| 9     | KHCO <sub>3</sub>               | 65.1     | 91.3     | 0.3 | 8.4  |
| 10    | Pyrrolidine                     | -        | -        | -   | -    |
| 11    | Et <sub>3</sub> N               | -        | -        | -   | -    |
| 12    | DABCO                           | 35.9     | 83.4     | 0   | 16.6 |
| 13    | DBU                             | 60.7     | 66.7     | 0   | 33.3 |

<sup>a</sup> Reaction conditions: iodobenzene (0.5 mmol),  $S_8$  (24 mg),  $CuI/CeO_x$  (20 mg), DMF (2 mL) and  $H_2O$  (67  $\mu$ L) as solvent, in Ar for 12 h.

**Table S5. Catalyst Comparisons**

| Entry<br>[a]                                                                                                                                                                                                                                                                                                                                                    | Cat.                                    | T<br>(°C) | t (h) | Con. (%) <sup>[b]</sup> | Sel. (%) <sup>[b]</sup> |       |      |
|-----------------------------------------------------------------------------------------------------------------------------------------------------------------------------------------------------------------------------------------------------------------------------------------------------------------------------------------------------------------|-----------------------------------------|-----------|-------|-------------------------|-------------------------|-------|------|
|                                                                                                                                                                                                                                                                                                                                                                 |                                         |           |       |                         | 2a                      | 3a    | 4a   |
| 1                                                                                                                                                                                                                                                                                                                                                               | Cu <sub>I</sub> /CeO <sub>x</sub>       | 80        | 12    | 28.9                    | 92.6                    | 0     | 7.4  |
| 2                                                                                                                                                                                                                                                                                                                                                               | Cu <sub>I</sub> /CeO <sub>x</sub>       | 90        | 12    | 50.2                    | 88.6                    | 0     | 11.4 |
| 3                                                                                                                                                                                                                                                                                                                                                               | Cu <sub>I</sub> /CeO <sub>x</sub>       | 100       | 12    | 82.6                    | 97.4                    | 2.1   | 0.5  |
| 4                                                                                                                                                                                                                                                                                                                                                               | Cu <sub>I</sub> /CeO <sub>x</sub>       | 110       | 12    | 97.7                    | 88.3                    | 0.5   | 11.2 |
| 5                                                                                                                                                                                                                                                                                                                                                               | Cu <sub>I</sub> /CeO <sub>x</sub>       | 120       | 12    | 99.7                    | 87.3                    | 2.3   | 10.4 |
| 6                                                                                                                                                                                                                                                                                                                                                               | Cu <sub>I</sub> /CeO <sub>x</sub>       | 130       | 12    | 97.7                    | 84.6                    | 5.4   | 10.0 |
| 7                                                                                                                                                                                                                                                                                                                                                               | Cu <sub>I</sub> /CeO <sub>x</sub>       | 110       | 14    | 97.8                    | 87.1                    | 0.8   | 12.1 |
| 8                                                                                                                                                                                                                                                                                                                                                               | Cu <sub>I</sub> /CeO <sub>x</sub>       | 110       | 8     | 89.6                    | 95.2                    | 1.1   | 3.7  |
| 9                                                                                                                                                                                                                                                                                                                                                               | Cu <sub>I</sub> /CeO <sub>x</sub>       | 110       | 10    | 97.1                    | 94.8                    | 1.1   | 4.1  |
| 10                                                                                                                                                                                                                                                                                                                                                              | CuCl <sub>2</sub>                       | 110       | 10    | 43.8                    | 79.3                    | 17.8  | 2.9  |
| 11                                                                                                                                                                                                                                                                                                                                                              | CuCl                                    | 110       | 10    | 50.4                    | 85.8                    | 13.7  | 0.5  |
| 12                                                                                                                                                                                                                                                                                                                                                              | CuO                                     | 110       | 10    | 28.6                    | 73.4                    | 0     | 26.6 |
| 13                                                                                                                                                                                                                                                                                                                                                              | Cu <sub>2</sub> O                       | 110       | 10    | 58.0                    | 89.6                    | 5.2   | 5.2  |
| 14                                                                                                                                                                                                                                                                                                                                                              | CuCl <sub>2</sub>                       | 110       | 8     | 14.3                    | 85.4                    | 14.6  | 0    |
| 15                                                                                                                                                                                                                                                                                                                                                              | CuCl                                    | 110       | 8     | 35.2                    | 86.2                    | 13.8  | 0    |
| 16                                                                                                                                                                                                                                                                                                                                                              | CuO                                     | 110       | 8     | 5.41                    | 91.7                    | 8.3   | 0    |
| 17                                                                                                                                                                                                                                                                                                                                                              | Cu <sub>2</sub> O                       | 110       | 8     | 36.2                    | 69.5                    | 18.34 | 12.2 |
| 18                                                                                                                                                                                                                                                                                                                                                              | Cu <sub>1+x</sub> (1%)/CeO <sub>x</sub> | 110       | 10    | 14.5                    | 58.5                    | 37.9  | 3.6  |
| 19 <sup>c</sup>                                                                                                                                                                                                                                                                                                                                                 | Cu <sub>1+x</sub> (1%)/CeO <sub>x</sub> | 110       | 10    | 27.3                    | 61.6                    | 38.4  | 0    |
| 20                                                                                                                                                                                                                                                                                                                                                              | Cu <sub>1+x</sub> (2%)/CeO <sub>x</sub> | 110       | 10    | 18.5                    | 70.3                    | 29.7  | 0    |
| 21 <sup>d</sup>                                                                                                                                                                                                                                                                                                                                                 | Cu <sub>1+x</sub> (2%)/CeO <sub>x</sub> | 110       | 10    | 39.6                    | 43.8                    | 56.5  | 0    |
| 22 <sup>e</sup>                                                                                                                                                                                                                                                                                                                                                 | CuCl <sub>2</sub>                       | 110       | 10    | 51.7                    | 85.8                    | 14.2  | 0    |
| [a] Reaction Conditions: Iodobenzene (0.5 mmol), S <sub>8</sub> (0.75 mmol), catalyst (0.4 mol% based on Cu to iodobenzene), NaOH (2.0 mmol), DMF (2 mL) and H <sub>2</sub> O (67 uL), Ar. [b] conversion and selectivity are determined by GC and GC-MS. [c] 20 mg catalysts was used. [d] 20 mg catalysts were used. [e] 1.2 mol% based on Cu to iodobenzene. |                                         |           |       |                         |                         |       |      |

**Table S6. Recycled for the catalyst.** ICP-OES shows that 0.638% Cu species in recycled Cu<sub>1</sub>/CeO<sub>x</sub> catalysts.

| Recycled times <sup>[a]</sup>                                                                                                                                                                                                                                                      | Con. (%) <sup>[b]</sup> | Sel. (%) <sup>[b]</sup> |     |     |
|------------------------------------------------------------------------------------------------------------------------------------------------------------------------------------------------------------------------------------------------------------------------------------|-------------------------|-------------------------|-----|-----|
|                                                                                                                                                                                                                                                                                    |                         | 2a                      | 3a  | 4a  |
| <b>1</b>                                                                                                                                                                                                                                                                           | 96.6                    | 99.3                    | 0.7 | 0   |
| <b>2</b>                                                                                                                                                                                                                                                                           | 94.6                    | 98.7                    | 1.3 | 0   |
| <b>3</b>                                                                                                                                                                                                                                                                           | 93.6                    | 97.8                    | 1.4 | 0.8 |
| <b>4</b>                                                                                                                                                                                                                                                                           | 93.5                    | 98.2                    | 0.6 | 1.2 |
| [a] Reaction Conditions: Iodobenzene (0.5 mmol), S <sub>8</sub> (0.75 mmol), Cu <sub>1</sub> /CeO <sub>x</sub> (1.2% mol based on Cu to iodobenzene), NaOH (2.0 mmol), DMF (2 mL) and H <sub>2</sub> O (67 μL), Ar. [b] conversion and selectivity are determined by GC and GC-MS. |                         |                         |     |     |

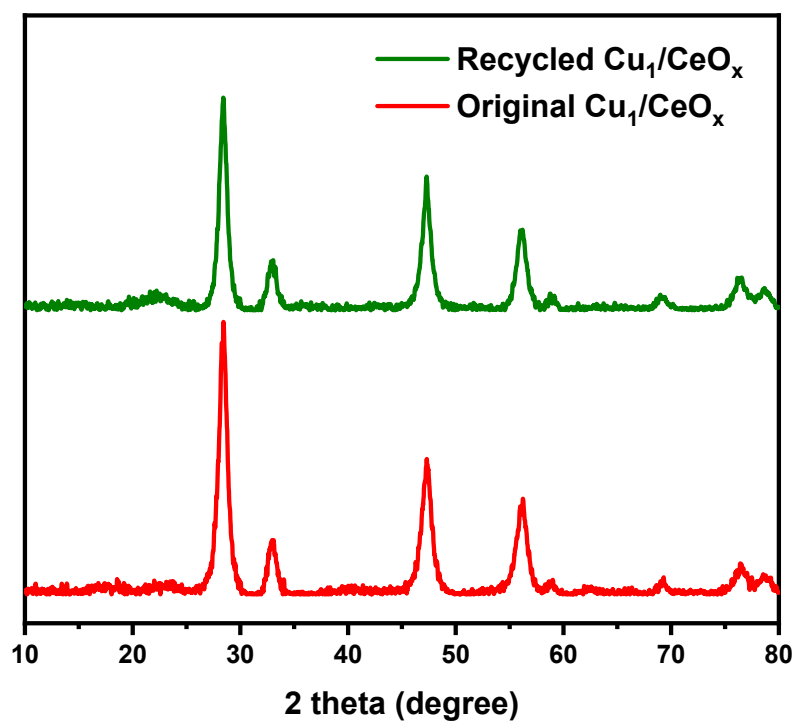

**Figure S13.** The XRD comparison between original Cu<sub>1</sub>/CeO<sub>x</sub> and recycled Cu<sub>1</sub>/CeO<sub>x</sub> catalysts.

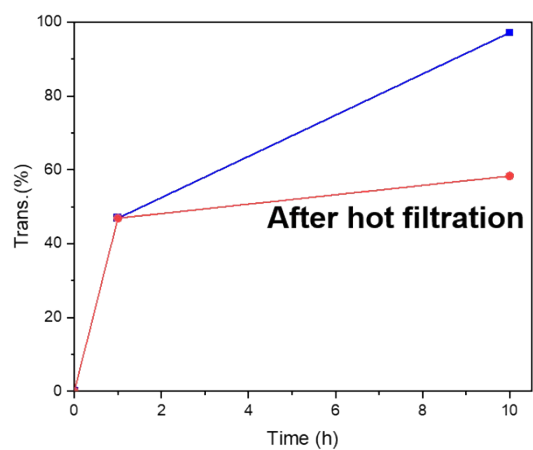

**Figure S14. Hot filtration reaction.** ICP-OES shows that just 0.0022% Cu species in reaction tube.

## NMR data for compound 2

### General information

$^1\text{H}$  NMR,  $^{13}\text{C}$  NMR and  $^{19}\text{F}$  NMR spectra were recorded on a BRUKER AVANCE-400 in  $\text{CDCl}_3$  with TMS as an internal standard at room temperature. All diaryl disulfide are known compounds, and analytical data are consistent with literature values<sup>[2-14]</sup>.

### Procedure and NMR data for 2a-2z

#### 1,2-diphenyldisulfane (2a)<sup>[4,6]</sup>

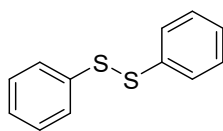

A 10 mL Schlenk tube was charged with iodobenzene (102.0 mg, 0.5 mmol), 0.75 mmol elemental sulfur (24.0 mg, 1.5 equiv., 0.75 mmol), NaOH (80.0 mg, 4.0 equiv., 2 mmol) and  $\text{Cu}_1/\text{CeO}_x$  catalyst (20 mg, 0.434 mol%,  $2.17 \times 10^{-3}$  mmol) and 2 mL DMF under nitrogen atmosphere. After stirring the result mixture under specific temperature and time, the catalyst was removed through centrifugation. Then the mixture was cooled and then poured into 5 mL saturated  $\text{NH}_4\text{Cl}$  solution, extracted with ethyl acetate (3 x 10 mL), and washed with water (3 x 10 mL). The combined organic layers were dried over anhydrous  $\text{Na}_2\text{SO}_4$ . The residue was purified by flash column chromatography on silica gel use petroleum ether to afford the desired product **2a** as White solid (87% yield, 47.4 mg);  $^1\text{H}$  NMR (400 MHz, Chloroform-*d*)  $\delta$  7.57-7.50 (m, 4H), 7.38-7.29 (m, 4H), 7.29-7.22 (m, 2H).  $^{13}\text{C}$  NMR (101 MHz, Chloroform-*d*)  $\delta$  137.1, 129.1, 127.5, 127.2.

#### 1,2-di-*p*-tolylidisulfane (2b)<sup>[3]</sup>

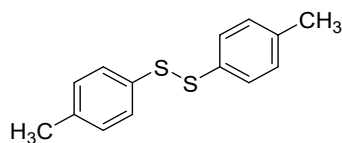

A 10 mL Schlenk tube was charged with 1-iodo-4-methylbenzene (108.9 mg, 0.5 mmol), 0.75 mmol elemental sulfur (24.0 mg, 1.5 equiv., 0.75 mmol), NaOH (80.0 mg,

4.0 equiv., 2 mmol) and Cu<sub>1</sub>/CeO<sub>x</sub> catalyst (20 mg, 0.434 mol%, 2.17 x 10<sup>-3</sup> mmol) and 2 mL DMF under nitrogen atmosphere. After stirring the result mixture under specific temperature and time, the catalyst was removed through centrifugation. Then the mixture was cooled and then poured into 5 mL saturated NH<sub>4</sub>Cl solution, extracted with ethyl acetate (3 x 10 mL), and washed with water (3 x 10 mL). The combined organic layers were dried over anhydrous Na<sub>2</sub>SO<sub>4</sub>. The residue was purified by flash column chromatography on silica gel use petroleum ether to afford the desired product **2b** as white solid (93% yield, 57.2 mg); <sup>1</sup>H NMR (400 MHz, Chloroform-*d*) δ 7.54-7.37 (m, 4H), 7.27-7.07 (m, 4H), 2.35 (s, 6H). <sup>13</sup>C NMR (101 MHz, Chloroform-*d*) δ 137.5, 134.0, 129.9, 128.6, 21.1.

### 1,2-di-*m*-tolylidysulfane (**2c**)<sup>[8]</sup>

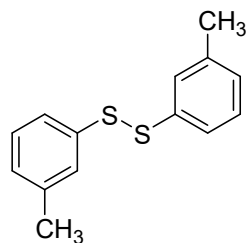

A 10 mL Schlenk tube was charged with 1-iodo-3-methylbenzene (108.9 mg, 0.5 mmol), 0.75 mmol elemental sulfur (24.0 mg, 1.5 equiv., 0.75 mmol), NaOH (80.0 mg, 4.0 equiv., 2 mmol) and Cu<sub>1</sub>/CeO<sub>x</sub> catalyst (20 mg, 0.434 mol%, 2.17 x 10<sup>-3</sup> mmol) and 2 mL DMF under nitrogen atmosphere. After stirring the result mixture under specific temperature and time, the catalyst was removed through centrifugation. Then the mixture was cooled and then poured into 5 mL saturated NH<sub>4</sub>Cl solution, extracted with ethyl acetate (3 x 10 mL), and washed with water (3 x 10 mL). The combined organic layers were dried over anhydrous Na<sub>2</sub>SO<sub>4</sub>. The residue was purified by flash column chromatography on silica gel use petroleum ether to afford the desired product **2c** as yellow solid (84% yield, 51.7 mg); <sup>1</sup>H NMR (400 MHz, Chloroform-*d*) δ 7.35-7.29 (m, 4H), 7.24-7.17 (m, 2H), 7.09-7.00 (m, 2H), 2.33 (s, 6H). <sup>13</sup>C NMR (101 MHz, Chloroform-*d*) δ 139.0, 136.9, 128.9, 128.1, 128.0, 124.6, 21.4.

### 1,2-di-*o*-tolylidysulfane (**2d**)<sup>[8]</sup>

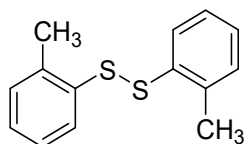

A 10 mL Schlenk tube was charged with 1-iodo-2-methylbenzene (108.9 mg, 0.5 mmol), 0.75 mmol elemental sulfur (24.0 mg, 1.5 equiv., 0.75 mmol), NaOH (80.0 mg, 4.0 equiv., 2 mmol) and Cu<sub>1</sub>/CeO<sub>x</sub> catalyst (20 mg, 0.434 mol%, 2.17 x 10<sup>-3</sup> mmol) and 2 mL DMF under nitrogen atmosphere. After stirring the result mixture under specific temperature and time, the catalyst was removed through centrifugation. Then the mixture was cooled and then poured into 5 mL saturated NH<sub>4</sub>Cl solution, extracted with ethyl acetate (3 x 10 mL), and washed with water (3 x 10 mL). The combined organic layers were dried over anhydrous Na<sub>2</sub>SO<sub>4</sub>. The residue was purified by flash column chromatography on silica gel use petroleum ether to afford the desired product **2d** as yellow solid (81% yield, 49.8 mg); <sup>1</sup>H NMR (400 MHz, Chloroform-*d*) δ 7.60-7.44 (m, 2H), 7.23-7.07 (m, 6H), 2.44 (s, 6H). <sup>13</sup>C NMR (101 MHz, Chloroform-*d*) δ 137.4, 135.4, 130.4, 128.6, 127.3, 126.7, 20.0.

#### 1,2-bis(4-methoxyphenyl)disulfane (**2e**)<sup>[3,5]</sup>

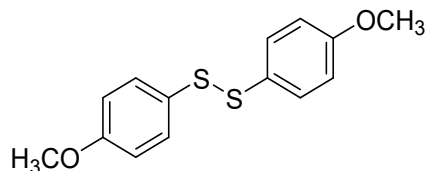

A 10 mL Schlenk tube was charged with 1-iodo-4-methoxybenzene (117.0 mg, 0.5 mmol), 0.75 mmol elemental sulfur (24.0 mg, 1.5 equiv., 0.75 mmol), NaOH (80.0 mg, 4.0 equiv., 2 mmol) and Cu<sub>1</sub>/CeO<sub>x</sub> catalyst (20 mg, 0.434 mol%, 2.17 x 10<sup>-3</sup> mmol) and 2 mL DMF under nitrogen atmosphere. After stirring the result mixture under specific temperature and time, the catalyst was removed through centrifugation. Then the mixture was cooled and then poured into 5 mL saturated NH<sub>4</sub>Cl solution, extracted with ethyl acetate (3 x 10 mL), and washed with water (3 x 10 mL). The combined organic layers were dried over anhydrous Na<sub>2</sub>SO<sub>4</sub>. The residue was purified by flash column chromatography on silica gel use petroleum ether to afford the desired product **2e** as yellow oil (85% yield, 59.1 mg); <sup>1</sup>H NMR (400 MHz, Chloroform-*d*) δ 7.42-7.38 (m,

4H), 6.88-6.81 (m, 4H), 3.80 (s, 6H).  $^{13}\text{C}$  NMR (101 MHz, Chloroform-*d*)  $\delta$  159.9, 132.7, 128.5, 114.6, 55.4.

**1,2-bis(2-methoxyphenyl)disulfane (2f)<sup>[3]</sup>**

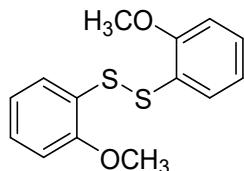

A 10 mL Schlenk tube was charged with 1-iodo-2-methoxybenzene (117.0 mg, 0.5 mmol), 0.75 mmol elemental sulfur (24.0 mg, 1.5 equiv., 0.75 mmol), NaOH (80.0 mg, 4.0 equiv., 2 mmol) and  $\text{Cu}_1/\text{CeO}_x$  catalyst (20 mg, 0.434 mol%,  $2.17 \times 10^{-3}$  mmol) and 2 mL DMF under nitrogen atmosphere. After stirring the result mixture under specific temperature and time, the catalyst was removed through centrifugation. Then the mixture was cooled and then poured into 5 mL saturated  $\text{NH}_4\text{Cl}$  solution, extracted with ethyl acetate (3 x 10 mL), and washed with water (3 x 10 mL). The combined organic layers were dried over anhydrous  $\text{Na}_2\text{SO}_4$ . The residue was purified by flash column chromatography on silica gel use petroleum ether to afford the desired product **2f** as colorless Oil (78% yield, 54.2 mg);  $^1\text{H}$  NMR (400 MHz, Chloroform-*d*)  $\delta$  7.55-7.50 (m, 2H), 7.24-7.15 (m, 2H), 6.98-6.82 (m, 4H), 3.90 (s, 6H).  $^{13}\text{C}$  NMR (101 MHz, Chloroform-*d*)  $\delta$  156.6, 127.8, 127.6, 124.6, 121.4, 110.5, 55.9.

**1,2-bis(4-ethylphenyl)disulfane (2g)<sup>[9]</sup>**

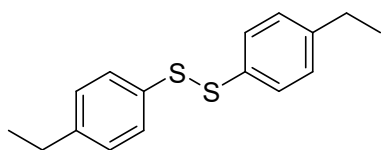

A 10 mL Schlenk tube was charged with 1-ethyl-4-iodobenzene (116.0 mg, 0.5 mmol), 0.75 mmol elemental sulfur (24.0 mg, 1.5 equiv., 0.75 mmol), NaOH (80.0 mg, 4.0 equiv., 2 mmol) and  $\text{Cu}_1/\text{CeO}_x$  catalyst (20 mg, 0.434 mol%,  $2.17 \times 10^{-3}$  mmol) and 2 mL DMF under nitrogen atmosphere. After stirring the result mixture under specific temperature and time, the catalyst was removed through centrifugation. Then the mixture was cooled and then poured into 5 mL saturated  $\text{NH}_4\text{Cl}$  solution, extracted with ethyl acetate (3 x 10 mL), and washed with water (3 x 10 mL). The combined organic layers were dried over anhydrous  $\text{Na}_2\text{SO}_4$ . The residue was purified by flash column

chromatography on silica gel use petroleum ether to afford the desired product **2g** as colorless oil (79% yield, 54.1 mg); <sup>1</sup>H NMR (400 MHz, Chloroform-*d*) δ 7.47-7.40 (m, 4H), 7.18-7.11 (m, 4H), 2.63 (q, *J* = 7.6 Hz, 4H), 1.22 (t, *J* = 7.6 Hz, 6H). <sup>13</sup>C NMR (101 MHz, Chloroform-*d*) δ 143.8, 134.2, 128.7, 128.4, 28.5, 15.5.

#### 1,2-bis(4-isopropylphenyl)disulfane (**2h**)<sup>[7]</sup>

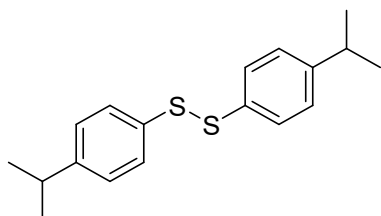

A 10 mL Schlenk tube was charged with 1-iodo-4-isopropylbenzene (123.0 mg, 0.5 mmol), 0.75 mmol elemental sulfur (24.0 mg, 1.5 equiv., 0.75 mmol), NaOH (80.0 mg, 4.0 equiv., 2 mmol) and Cu<sub>1</sub>/CeO<sub>x</sub> catalyst (20 mg, 0.434 mol%, 2.17 x 10<sup>-3</sup> mmol) and 2 mL DMF under nitrogen atmosphere. After stirring the result mixture under specific temperature and time, the catalyst was removed through centrifugation. Then the mixture was cooled and then poured into 5 mL saturated NH<sub>4</sub>Cl solution, extracted with ethyl acetate (3 x 10 mL), and washed with water (3 x 10 mL). The combined organic layers were dried over anhydrous Na<sub>2</sub>SO<sub>4</sub>. The residue was purified by flash column chromatography on silica gel use petroleum ether to afford the desired product **2h** as yellow oil (85% yield, 64.2 mg); <sup>1</sup>H NMR (400 MHz, Chloroform-*d*) δ 7.49-7.42 (m, 4H), 7.24-7.13 (m, 4H), 2.94-2.85 (m, 2H), 1.24 (d, *J* = 6.9 Hz, 12H). <sup>13</sup>C NMR (101 MHz, Chloroform-*d*) δ 148.3, 131.1, 128.2, 127.3, 33.8, 23.9.

#### 1,2-bis(4-(*tert*-butyl)phenyl)disulfane (**2i**)<sup>[5]</sup>

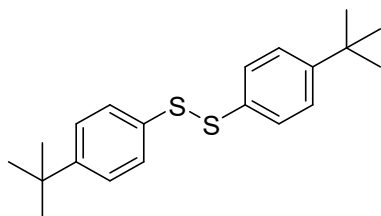

A 10 mL Schlenk tube was charged with 1-(*tert*-butyl)-4-iodobenzene (130.0 mg, 0.5 mmol), 0.75 mmol elemental sulfur (24.0 mg, 1.5 equiv., 0.75 mmol), NaOH (80.0 mg, 4.0 equiv., 2 mmol) and Cu<sub>1</sub>/CeO<sub>x</sub> catalyst (20 mg, 0.434 mol%, 2.17 x 10<sup>-3</sup> mmol) and

2 mL DMF under nitrogen atmosphere. After stirring the result mixture under specific temperature and time, the catalyst was removed through centrifugation. Then the mixture was cooled and then poured into 5 mL saturated  $\text{NH}_4\text{Cl}$  solution, extracted with ethyl acetate (3 x 10 mL), and washed with water (3 x 10 mL). The combined organic layers were dried over anhydrous  $\text{Na}_2\text{SO}_4$ . The residue was purified by flash column chromatography on silica gel use petroleum ether to afford the desired product **2i** as white solid (66% yield, 54.5 mg);  $^1\text{H}$  NMR (400 MHz, Chloroform-*d*)  $\delta$  7.44 (d,  $J$  = 8.5 Hz, 4H), 7.33 (d,  $J$  = 8.5 Hz, 4H), 1.29 (s, 18H).  $^{13}\text{C}$  NMR (101 MHz, Chloroform-*d*)  $\delta$  150.5, 134.0, 127.8, 126.2, 34.6, 31.3.

**1,2-bis(4-fluorophenyl)disulfane (2j)**<sup>[3,4,5]</sup>

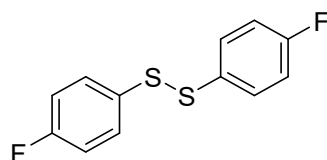

A 10 mL Schlenk tube was charged with 1-fluoro-4-iodobenzene (111.0 mg, 0.5 mmol), 0.75 mmol elemental sulfur (24.0 mg, 1.5 equiv., 0.75 mmol), NaOH (80.0 mg, 4.0 equiv., 2 mmol) and  $\text{Cu}_1/\text{CeO}_x$  catalyst (20 mg, 0.434 mol%,  $2.17 \times 10^{-3}$  mmol) and 2 mL DMF under nitrogen atmosphere. After stirring the result mixture under specific temperature and time, the catalyst was removed through centrifugation. Then the mixture was cooled and then poured into 5 mL saturated  $\text{NH}_4\text{Cl}$  solution, extracted with ethyl acetate (3 x 10 mL), and washed with water (3 x 10 mL). The combined organic layers were dried over anhydrous  $\text{Na}_2\text{SO}_4$ . The residue was purified by flash column chromatography on silica gel use petroleum ether to afford the desired product **2j** as white solid (81% yield, 51.4 mg);  $^1\text{H}$  NMR (400 MHz, Chloroform-*d*)  $\delta$  7.61-7.41 (m, 4H), 7.12-6.85 (m, 4H).  $^{13}\text{C}$  NMR (101 MHz, Chloroform-*d*)  $\delta$  162.6 (d,  $J$  = 248.0 Hz), 132.2 (d,  $J$  = 3.0 Hz), 131.3 (d,  $J$  = 8.1 Hz), 116.3 (d,  $J$  = 21.9 Hz).  $^{19}\text{F}$  NMR (377 MHz, Chloroform-*d*)  $\delta$  -113.6.

**1,2-bis(4-chlorophenyl)disulfane (2k)**<sup>[3,6]</sup>

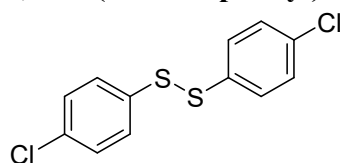

A 10 mL Schlenk tube was charged with 1-chloro-4-iodobenzene (119.0 mg, 0.5 mmol), 0.75 mmol elemental sulfur (24.0 mg, 1.5 equiv., 0.75 mmol), NaOH (80.0 mg, 4.0 equiv., 2 mmol) and Cu<sub>1</sub>/CeO<sub>x</sub> catalyst (20 mg, 0.434 mol%, 2.17 x 10<sup>-3</sup> mmol) and 2 mL DMF under nitrogen atmosphere. After stirring the result mixture under specific temperature and time, the catalyst was removed through centrifugation. Then the mixture was cooled and then poured into 5 mL saturated NH<sub>4</sub>Cl solution, extracted with ethyl acetate (3 x 10 mL), and washed with water (3 x 10 mL). The combined organic layers were dried over anhydrous Na<sub>2</sub>SO<sub>4</sub>. The residue was purified by flash column chromatography on silica gel use petroleum ether to afford the desired product **2k** as white solid (72% yield, 51.5 mg); <sup>1</sup>H NMR (400 MHz, Chloroform-*d*) δ 7.44-7.38 (m, 4H), 7.32-7.25 (m, 4H). <sup>13</sup>C NMR (101 MHz, Chloroform-*d*) δ 135.2, 133.7, 129.5, 129.4.

**1,2-bis(4-bromophenyl)disulfane (2l)<sup>[2,4,6]</sup>**

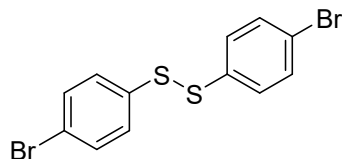

A 10 mL Schlenk tube was charged with 1-bromo-4-iodobenzene (140.9 mg, 0.5 mmol), 0.75 mmol elemental sulfur (24.0 mg, 1.5 equiv., 0.75 mmol), NaOH (80.0 mg, 4.0 equiv., 2 mmol) and Cu<sub>1</sub>/CeO<sub>x</sub> catalyst (20 mg, 0.434 mol%, 2.17 x 10<sup>-3</sup> mmol) and 2 mL DMF under nitrogen atmosphere. After stirring the result mixture under specific temperature and time, the catalyst was removed through centrifugation. Then the mixture was cooled and then poured into 5 mL saturated NH<sub>4</sub>Cl solution, extracted with ethyl acetate (3 x 10 mL), and washed with water (3 x 10 mL). The combined organic layers were dried over anhydrous Na<sub>2</sub>SO<sub>4</sub>. The residue was purified by flash column chromatography on silica gel use petroleum ether to afford the desired product **2l** as yellow solid (66% yield, 61.7 mg); <sup>1</sup>H NMR (400 MHz, Chloroform-*d*) δ 7.44– 7.42 (m, 4H), 7.35 – 7.32 (m, 4H). <sup>13</sup>C NMR (101 MHz, Chloroform-*d*) δ 135.8, 132.2, 129.4, 121.6.

**1,2-bis(3-fluorophenyl)disulfane (2m)<sup>[10]</sup>**

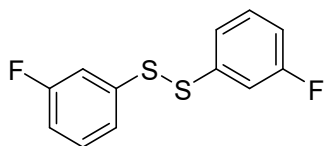

A 10 mL Schlenk tube was charged with 1-fluoro-3-iodobenzene (111.0 mg, 0.5 mmol), 0.75 mmol elemental sulfur (24.0 mg, 1.5 equiv., 0.75 mmol), NaOH (80.0 mg, 4.0 equiv., 2 mmol) and Cu<sub>1</sub>/CeO<sub>x</sub> catalyst (20 mg, 0.434 mol%, 2.17 x 10<sup>-3</sup> mmol) and 2 mL DMF under nitrogen atmosphere. After stirring the result mixture under specific temperature and time, the catalyst was removed through centrifugation. Then the mixture was cooled and then poured into 5 mL saturated NH<sub>4</sub>Cl solution, extracted with ethyl acetate (3 x 10 mL), and washed with water (3 x 10 mL). The combined organic layers were dried over anhydrous Na<sub>2</sub>SO<sub>4</sub>. The residue was purified by flash column chromatography on silica gel use petroleum ether to afford the desired product **2m** as colorless oil (67% yield, 42.5 mg); <sup>1</sup>H NMR (400 MHz, Chloroform-*d*) δ 7.43-7.12 (m, 3H), 7.02-6.83 (m, 1H). <sup>13</sup>C NMR (101 MHz, Chloroform-*d*) δ 163.1 (d, *J* = 249.2 Hz), 130.5 (d, *J* = 8.2 Hz), 122.7 (d, *J* = 2.9 Hz), 117.0 (d, *J* = 23.4 Hz), 114.4 (d, *J* = 21.6 Hz), 114.0 (d, *J* = 24.1 Hz). <sup>19</sup>F NMR (377 MHz, Chloroform-*d*) δ -111.2.

### 1,2-bis(3-chlorophenyl)disulfane (**2n**)<sup>[3]</sup>

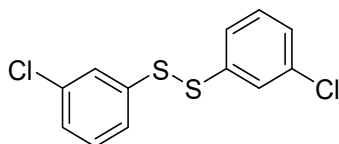

A 10 mL Schlenk tube was charged with 1-chloro-3-iodobenzene (119.0 mg, 0.5 mmol), 0.75 mmol elemental sulfur (24.0 mg, 1.5 equiv., 0.75 mmol), NaOH (80.0 mg, 4.0 equiv., 2 mmol) and Cu<sub>1</sub>/CeO<sub>x</sub> catalyst (20 mg, 0.434 mol%, 2.17 x 10<sup>-3</sup> mmol) and 2 mL DMF under nitrogen atmosphere. After stirring the result mixture under specific temperature and time, the catalyst was removed through centrifugation. Then the mixture was cooled and then poured into 5 mL saturated NH<sub>4</sub>Cl solution, extracted with ethyl acetate (3 x 10 mL), and washed with water (3 x 10 mL). The combined organic layers were dried over anhydrous Na<sub>2</sub>SO<sub>4</sub>. The residue was purified by flash column chromatography on silica gel use petroleum ether to afford the desired product **2n** as colorless oil (62% yield, 44.3 mg); <sup>1</sup>H NMR (400 MHz, Chloroform-*d*) δ 7.53 -7.49 (m,

2H), 7.41-7.33 (m, 2H), 7.32-7.21 (m, 4H).  $^{13}\text{C}$  NMR (101 MHz, Chloroform-*d*)  $\delta$  138.4, 135.2, 130.3, 127.6, 127.0, 125.4.

**1,2-bis(4-(trifluoromethyl)phenyl)disulfane (2o)<sup>[3]</sup>**

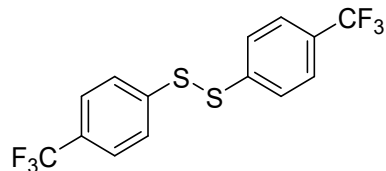

A 10 mL Schlenk tube was charged with 1-iodo-4-(trifluoromethyl)benzene (136.0 mg, 0.5 mmol), 0.75 mmol elemental sulfur (24.0 mg, 1.5 equiv., 0.75 mmol), NaOH (80.0 mg, 4.0 equiv., 2 mmol) and  $\text{Cu}_1/\text{CeO}_x$  catalyst (20 mg, 0.434 mol%,  $2.17 \times 10^{-3}$  mmol) and 2 mL DMF under nitrogen atmosphere. After stirring the result mixture under specific temperature and time, the catalyst was removed through centrifugation. Then the mixture was cooled and then poured into 5 mL saturated  $\text{NH}_4\text{Cl}$  solution, extracted with ethyl acetate (3 x 10 mL), and washed with water (3 x 10 mL). The combined organic layers were dried over anhydrous  $\text{Na}_2\text{SO}_4$ . The residue was purified by flash column chromatography on silica gel use petroleum ether to afford the desired product **2o** as colorless oil (60% yield, 53.1 mg);  $^1\text{H}$  NMR (400 MHz, Chloroform-*d*)  $\delta$  7.58 (s, 8H).  $^{13}\text{C}$  NMR (101 MHz, Chloroform-*d*)  $\delta$  140.8, 129.4 (q,  $J = 32.7$  Hz), 126.6, 126.2 (q,  $J = 3.8$  Hz), 123.9 (q,  $J = 272.3$  Hz).  $^{19}\text{F}$  NMR (377 MHz, Chloroform-*d*)  $\delta$  -62.6.

**1,2-bis(4-(trifluoromethoxy)phenyl)disulfane (2p)<sup>[5]</sup>**

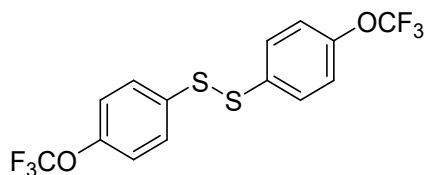

A 10 mL Schlenk tube was charged with 1-iodo-4-(trifluoromethoxy)benzene (144.0 mg, 0.5 mmol), 0.75 mmol elemental sulfur (24.0 mg, 1.5 equiv., 0.75 mmol), NaOH (80.0 mg, 4.0 equiv., 2 mmol) and  $\text{Cu}_1/\text{CeO}_x$  catalyst (20 mg, 0.434 mol%,  $2.17 \times 10^{-3}$  mmol) and 2 mL DMF under nitrogen atmosphere. After stirring the result mixture under specific temperature and time, the catalyst was removed through centrifugation. Then the mixture was cooled and then poured into 5 mL saturated  $\text{NH}_4\text{Cl}$  solution, extracted with ethyl acetate (3 x 10 mL), and washed with water (3 x 10 mL). The

combined organic layers were dried over anhydrous  $\text{Na}_2\text{SO}_4$ . The residue was purified by flash column chromatography on silica gel use petroleum ether to afford the desired product **2p** as colorless oil (71% yield, 67.6 mg);  $^1\text{H}$  NMR (400 MHz, Chloroform-*d*)  $\delta$  7.54-7.51 (m, 4H), 7.20-7.18 (m, 4H).  $^{13}\text{C}$  NMR (101 MHz, Chloroform-*d*)  $\delta$  148.7, 135.2, 129.3, 121.7, 120.5 (q,  $J = 257.7$  Hz).  $^{19}\text{F}$  NMR (376 MHz, Chloroform-*d*)  $\delta$  -58.07.

### 1,2-di([1,1'-biphenyl]-4-yl)disulfane (**2q**)<sup>[11]</sup>

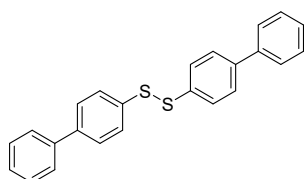

A 10 mL Schlenk tube was charged with 4-iodo-1,1'-biphenyl (140.0 mg, 0.5 mmol), 0.75 mmol elemental sulfur (24.0 mg, 1.5 equiv., 0.75 mmol), NaOH (80.0 mg, 4.0 equiv., 2 mmol) and  $\text{Cu}_1/\text{CeO}_x$  catalyst (20 mg, 0.434 mol%,  $2.17 \times 10^{-3}$  mmol) and 2 mL DMF under nitrogen atmosphere. After stirring the result mixture under specific temperature and time, the catalyst was removed through centrifugation. Then the mixture was cooled and then poured into 5 mL saturated  $\text{NH}_4\text{Cl}$  solution, extracted with ethyl acetate (3 x 10 mL), and washed with water (3 x 10 mL). The combined organic layers were dried over anhydrous  $\text{Na}_2\text{SO}_4$ . The residue was purified by flash column chromatography on silica gel use petroleum ether to afford the desired product **2q** as white solid (75% yield, 69.4 mg);  $^1\text{H}$  NMR (400 MHz, Chloroform-*d*)  $\delta$  7.67-7.55 (m, 12H), 7.51-7.42 (m, 4H), 7.41-7.33 (m, 2H).  $^{13}\text{C}$  NMR (101 MHz, Chloroform-*d*)  $\delta$  140.4, 140.2, 136.1, 128.9, 128.2, 127.8, 127.6, 127.0.

### 1,2-bis(3,5-dimethylphenyl)disulfane (**2r**)<sup>[5]</sup>

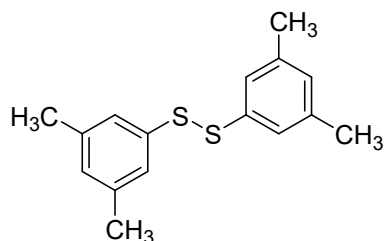

A 10 mL Schlenk tube was charged with 1-iodo-3,5-dimethylbenzene (116.0 mg, 0.5 mmol), 0.75 mmol elemental sulfur (24.0 mg, 1.5 equiv., 0.75 mmol), NaOH (80.0 mg,

4.0 equiv., 2 mmol) and Cu<sub>1</sub>/CeO<sub>x</sub> catalyst (20 mg, 0.434 mol%, 2.17 x 10<sup>-3</sup> mmol) and 2 mL DMF under nitrogen atmosphere. After stirring the result mixture under specific temperature and time, the catalyst was removed through centrifugation. Then the mixture was cooled and then poured into 5 mL saturated NH<sub>4</sub>Cl solution, extracted with ethyl acetate (3 x 10 mL), and washed with water (3 x 10 mL). The combined organic layers were dried over anhydrous Na<sub>2</sub>SO<sub>4</sub>. The residue was purified by flash column chromatography on silica gel use petroleum ether to afford the desired product **2r** as white solid (83% yield, 56.9 mg); <sup>1</sup>H NMR (400 MHz, Chloroform-*d*) δ 7.11 (s, 4H), 6.85 (s, 2H), 2.28 (s, 12H). <sup>13</sup>C NMR (101 MHz, Chloroform-*d*) δ 138.8, 136.8, 129.0, 125.1, 21.3.

#### 1,2-bis(3,5-dimethoxyphenyl)disulfane (**2s**)<sup>[12]</sup>

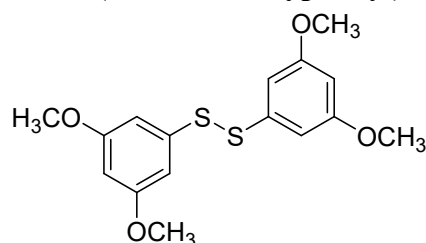

A 10 mL Schlenk tube was charged with 1-iodo-3,5-dimethoxybenzene (132.0 mg, 0.5 mmol), 0.75 mmol elemental sulfur (24.0 mg, 1.5 equiv., 0.75 mmol), NaOH (80.0 mg, 4.0 equiv., 2 mmol) and Cu<sub>1</sub>/CeO<sub>x</sub> catalyst (20 mg, 0.434 mol%, 2.17 x 10<sup>-3</sup> mmol) and 2 mL DMF under nitrogen atmosphere. After stirring the result mixture under specific temperature and time, the catalyst was removed through centrifugation. Then the mixture was cooled and then poured into 5 mL saturated NH<sub>4</sub>Cl solution, extracted with ethyl acetate (3 x 10 mL), and washed with water (3 x 10 mL). The combined organic layers were dried over anhydrous Na<sub>2</sub>SO<sub>4</sub>. The residue was purified by flash column chromatography on silica gel use petroleum ether to afford the desired product **2s** as colorless oil (77% yield, 65.1 mg); <sup>1</sup>H NMR (400 MHz, Chloroform-*d*) δ 6.67 (s, 4H), 6.30 (s, 2H), 3.75 (s, 12H). <sup>13</sup>C NMR (101 MHz, Chloroform-*d*) δ 161.1, 139.0, 105.0, 99.7, 55.5.

#### 1,2-bis(3,4-dimethylphenyl)disulfane (**2t**)<sup>[13]</sup>

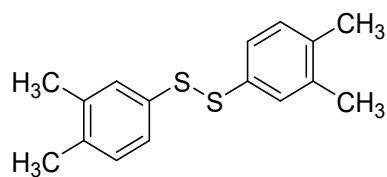

A 10 mL Schlenk tube was charged with 1-iodo-3,5-dimethylbenzene (116.0 mg, 0.5 mmol), 0.75 mmol elemental sulfur (24.0 mg, 1.5 equiv., 0.75 mmol), NaOH (80.0 mg, 4.0 equiv., 2 mmol) and Cu<sub>1</sub>/CeO<sub>x</sub> catalyst (20 mg, 0.434 mol%, 2.17 x 10<sup>-3</sup> mmol) and 2 mL DMF under nitrogen atmosphere. After stirring the result mixture under specific temperature and time, the catalyst was removed through centrifugation. Then the mixture was cooled and then poured into 5 mL saturated NH<sub>4</sub>Cl solution, extracted with ethyl acetate (3 x 10 mL), and washed with water (3 x 10 mL). The combined organic layers were dried over anhydrous Na<sub>2</sub>SO<sub>4</sub>. The residue was purified by flash column chromatography on silica gel use petroleum ether to afford the desired product **2t** as yellow oil (72% yield, 49.3 mg); <sup>1</sup>H NMR (400 MHz, Chloroform-*d*) δ 7.26-7.22 (m, 4H), 7.09-7.03 (m, 2H), 2.22 (s, 12H). <sup>13</sup>C NMR (101 MHz, Chloroform-*d*) δ 137.5, 136.1, 134.2, 130.3, 129.6, 126.0, 19.8, 19.4.

#### 1,2-dimesityldisulfane (**2u**)<sup>[14]</sup>

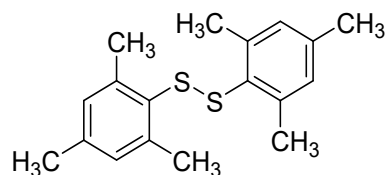

A 10 mL Schlenk tube was charged with 2-iodo-1,3,5-trimethylbenzene (123.0 mg, 0.5 mmol), 0.75 mmol elemental sulfur (24.0 mg, 1.5 equiv., 0.75 mmol), NaOH (80.0 mg, 4.0 equiv., 2 mmol) and Cu<sub>1</sub>/CeO<sub>x</sub> catalyst (20 mg, 0.434 mol%, 2.17 x 10<sup>-3</sup> mmol) and 2 mL DMF under nitrogen atmosphere. After stirring the result mixture under specific temperature and time, the catalyst was removed through centrifugation. Then the mixture was cooled and then poured into 5 mL saturated NH<sub>4</sub>Cl solution, extracted with ethyl acetate (3 x 10 mL), and washed with water (3 x 10 mL). The combined organic layers were dried over anhydrous Na<sub>2</sub>SO<sub>4</sub>. The residue was purified by flash column chromatography on silica gel use petroleum ether to afford the desired product **2u** as white solid (75% yield, 56.6 mg); <sup>1</sup>H NMR (400 MHz,

Chloroform-*d*)  $\delta$  6.83 (s, 4H), 2.25 (s, 6H), 2.20 (s, 12H).  $^{13}\text{C}$  NMR (101 MHz, Chloroform-*d*)  $\delta$  143.3, 139.3, 131.6, 128.9, 21.4, 21.1.

## Copies of NMR spectra of compounds 2

### 1,2-diphenyldisulfane (2a)

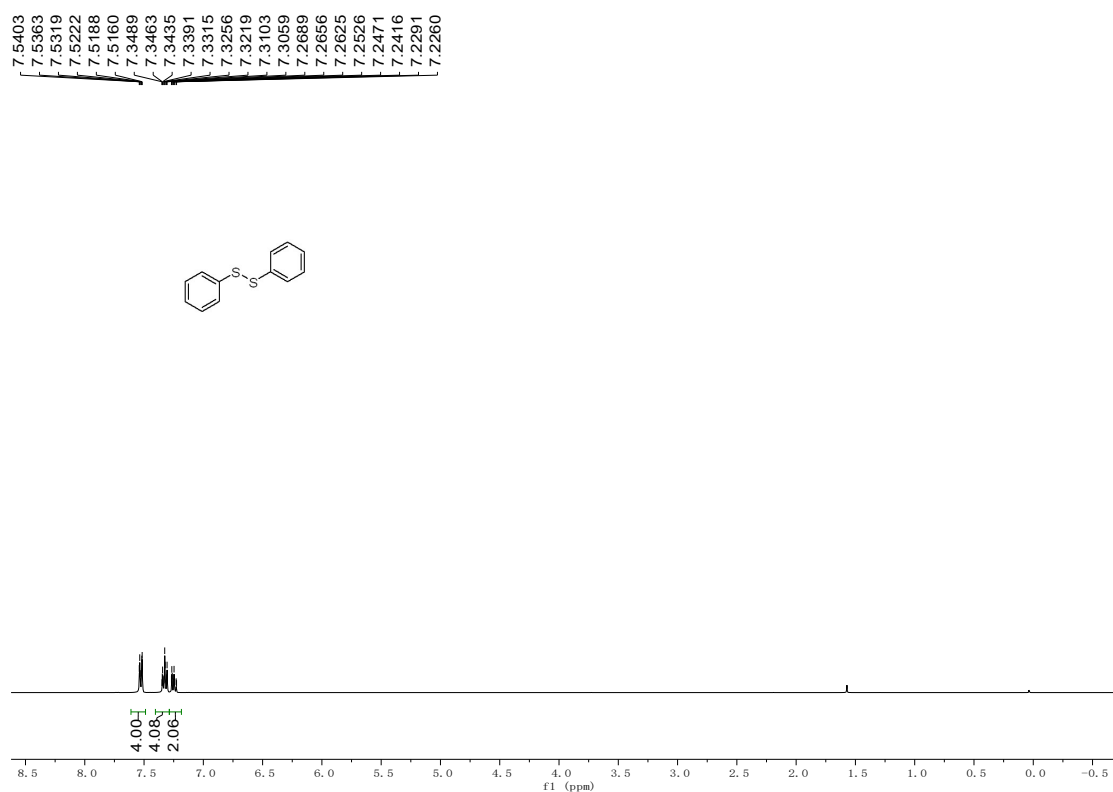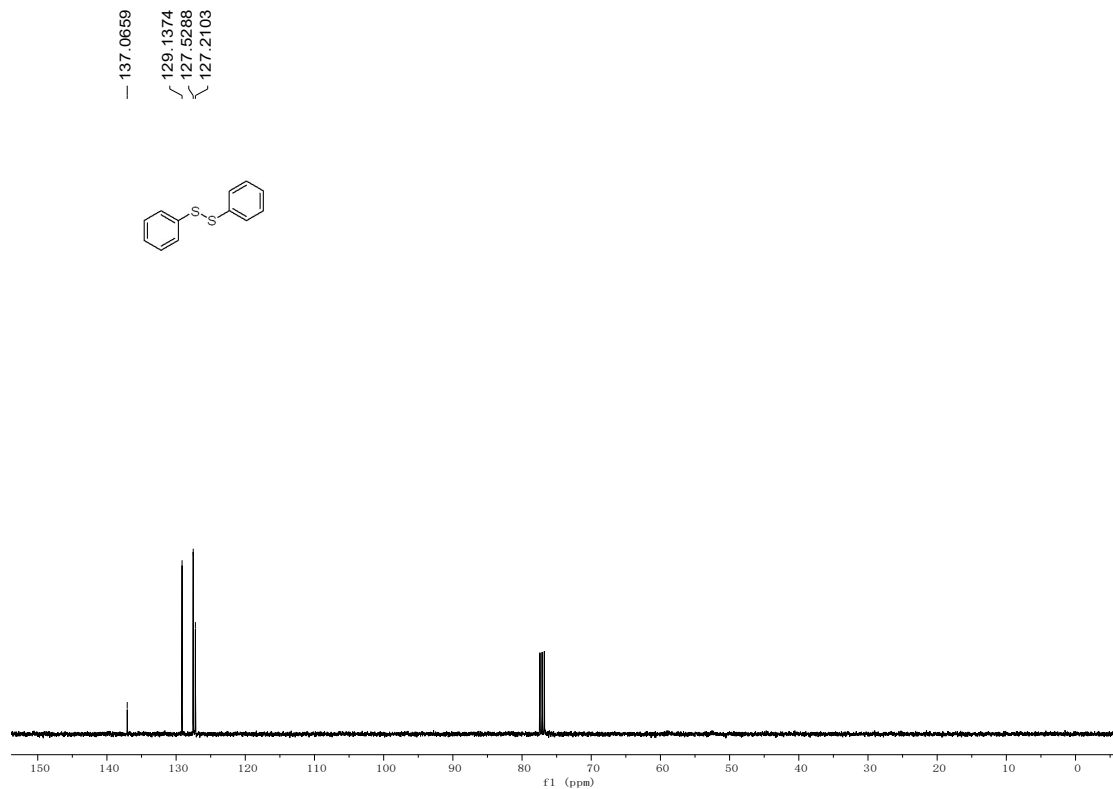

# 1,2-di-p-tolyldisulfane (2b)

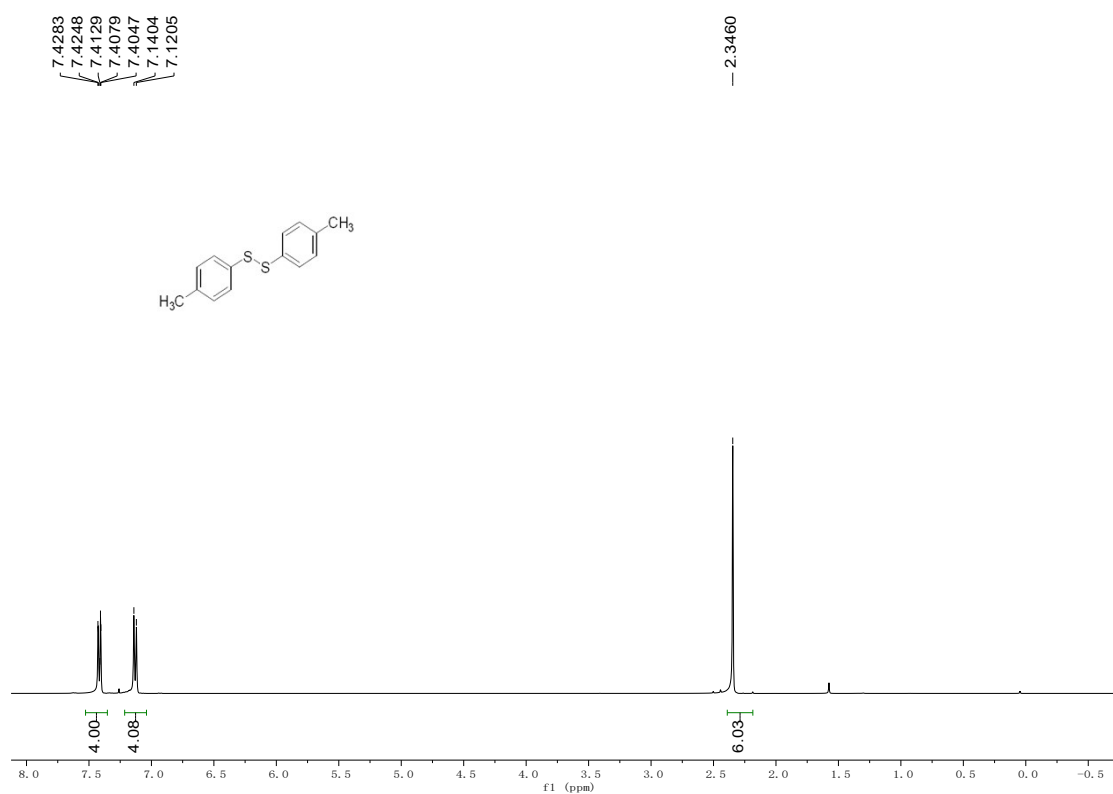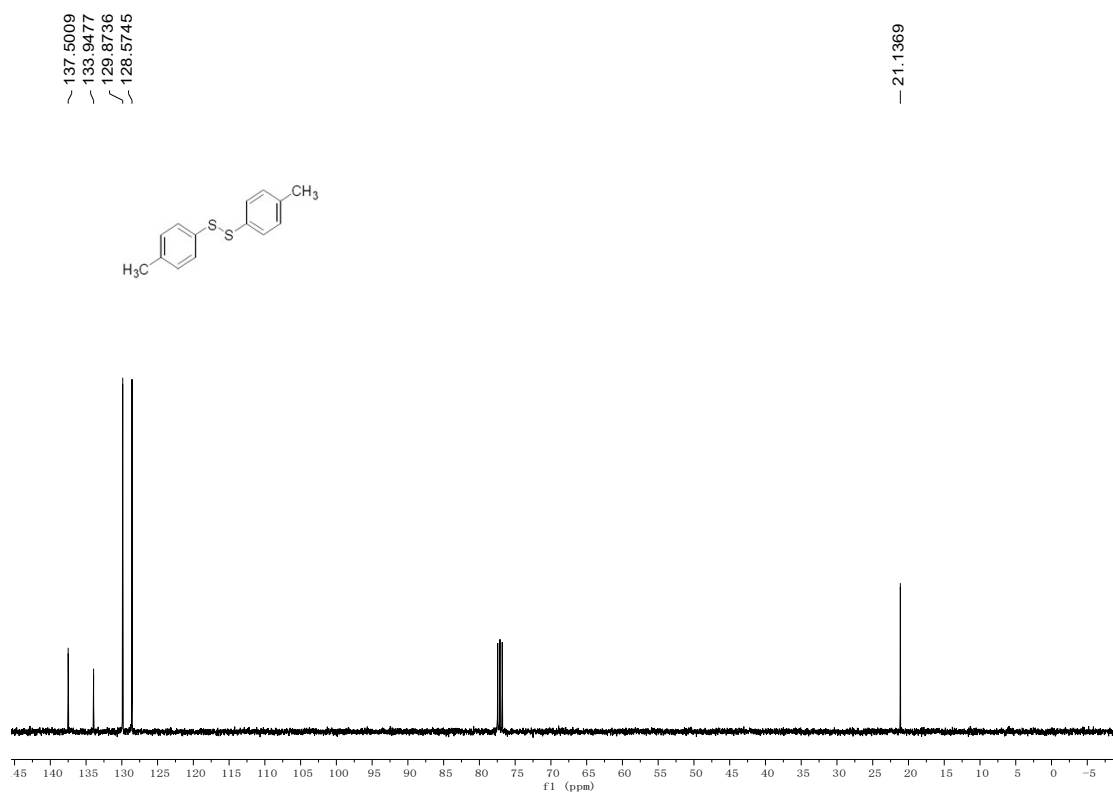

# 1,2-di-m-tolyldisulfane (2c)

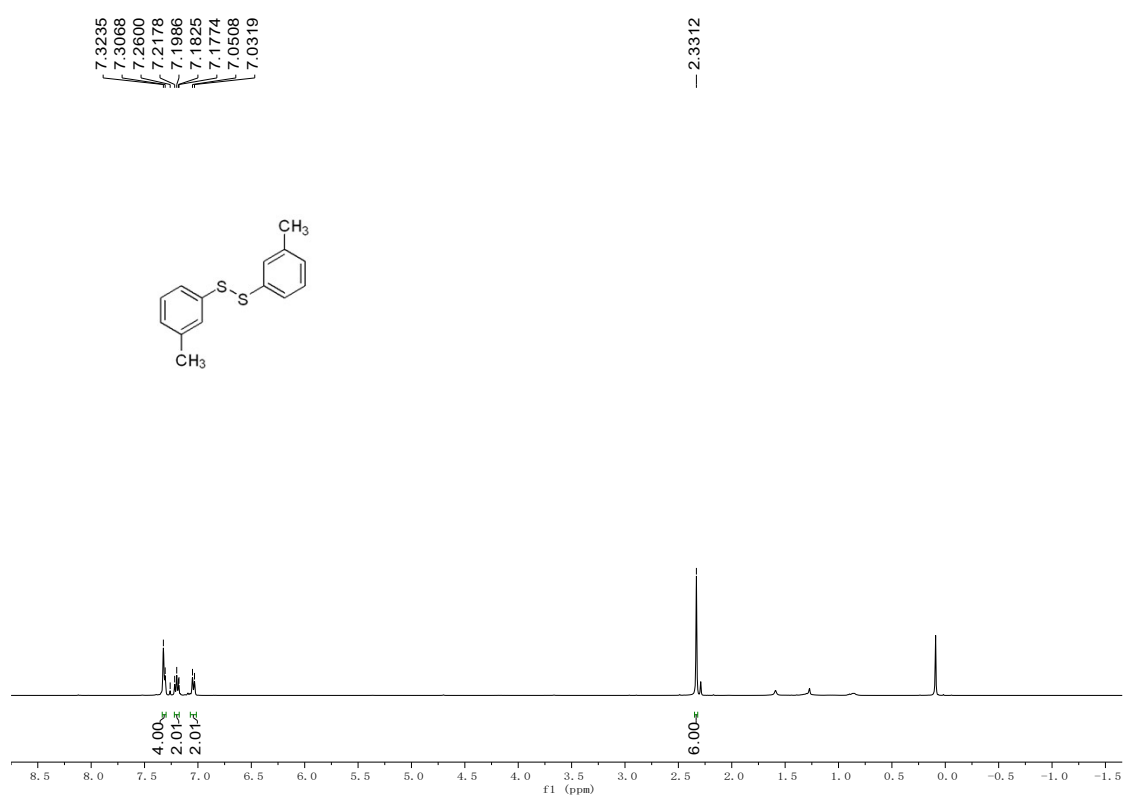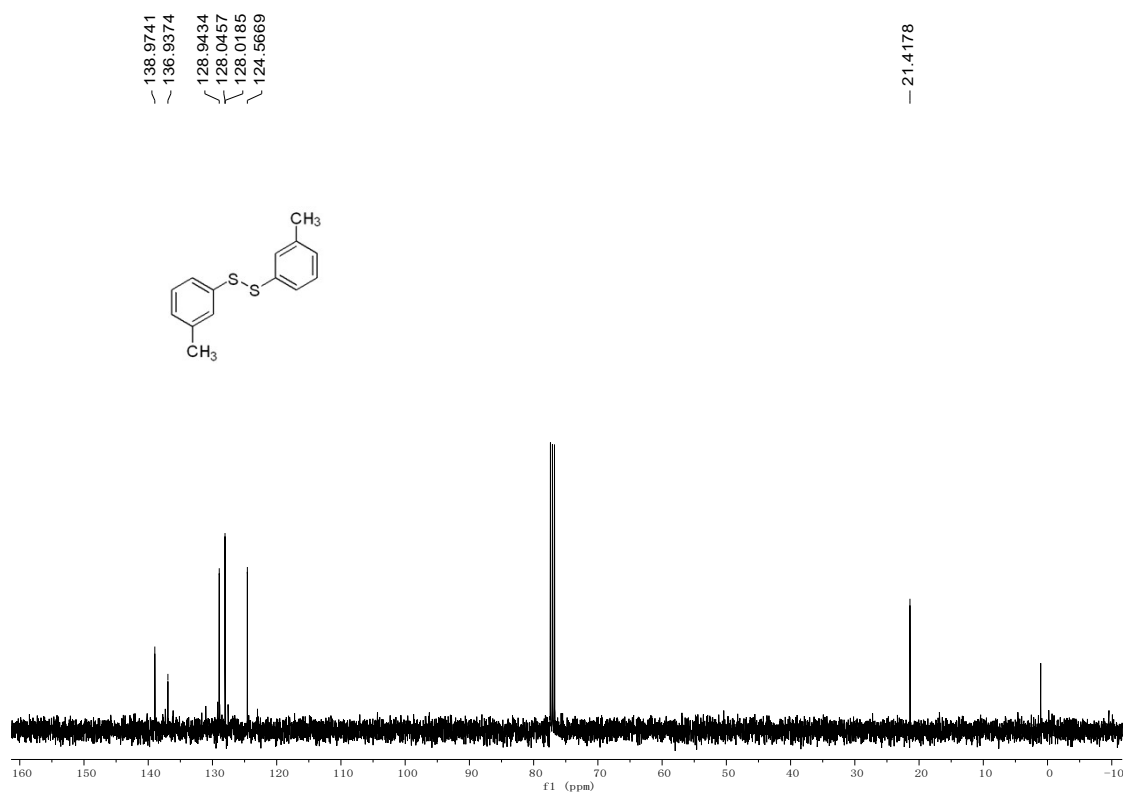

# 1,2-di-o-tolyldisulfane (2d)

7.5372  
7.5325  
7.5236  
7.5150  
7.2600  
7.1904  
7.1789  
7.1754  
7.1697  
7.1645  
7.1584  
7.1532  
7.1453  
7.1401  
7.1351  
7.1320

— 2.4394

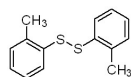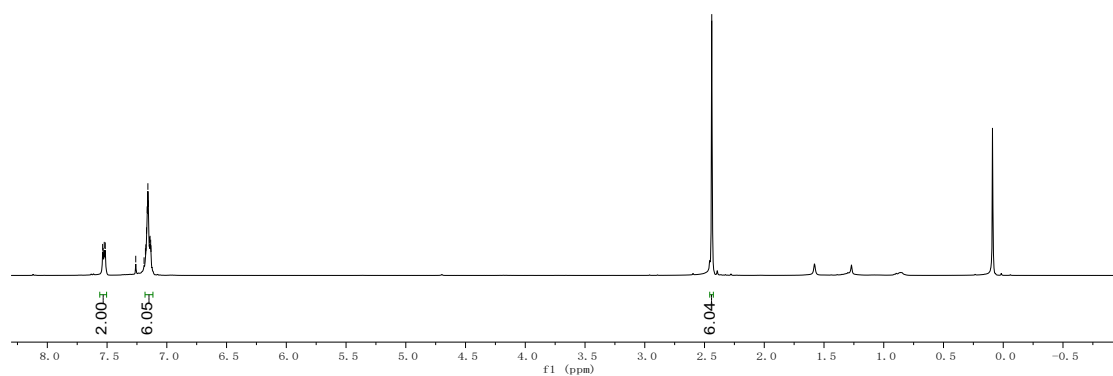

137.3649  
135.4216  
130.3527  
128.5594  
127.3338  
126.7400

— 20.0386

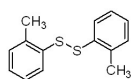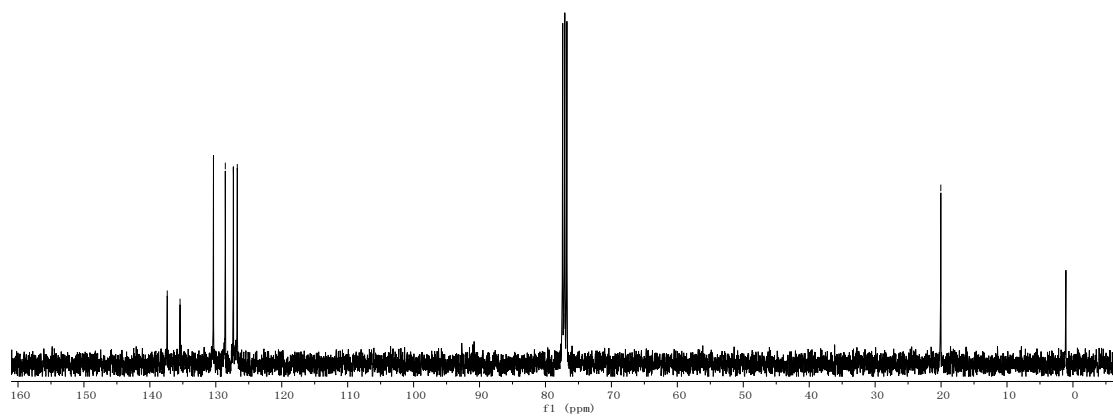

# 1,2-bis(4-methoxyphenyl)disulfane (2e)

7.4103  
7.4049  
7.3936  
7.3885  
7.3803  
7.2602  
6.8550  
6.8467  
6.8412  
6.8293  
6.8248  
6.8169

— 3.7992

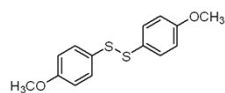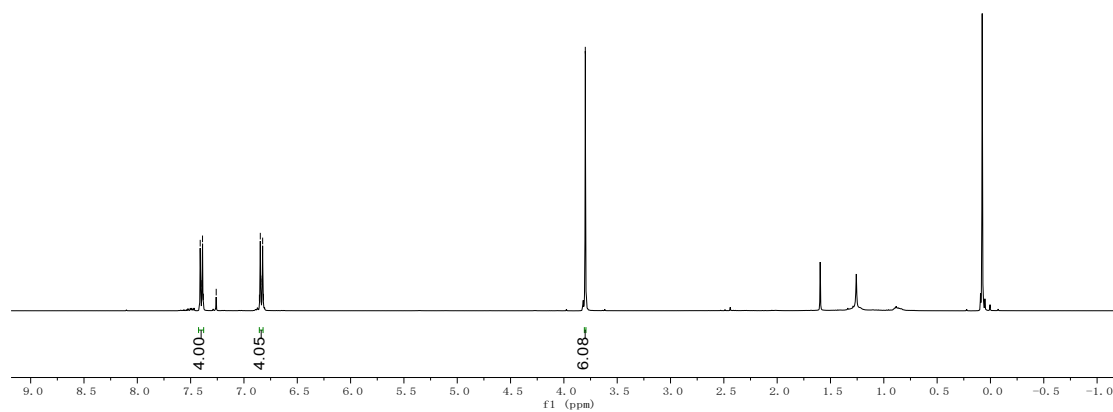

— 159.9388

— 132.7212

— 128.4508

— 114.6408

— 55.3989

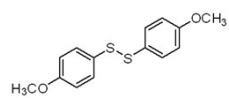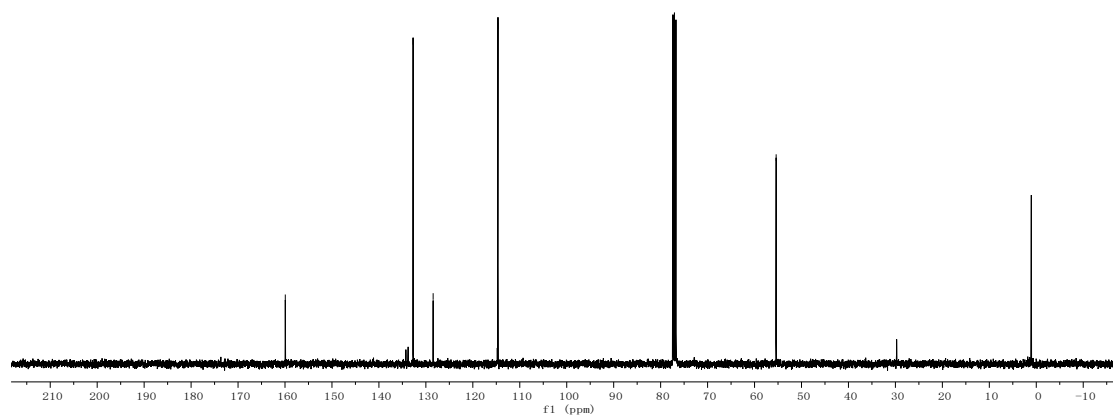

# 1,2-bis(2-methoxyphenyl)disulfane (2f)

7.5427  
7.5387  
7.5234  
7.5191  
7.2596  
7.2096  
7.2055  
7.1902  
7.1861  
7.1706  
7.1666  
6.9324  
6.9294  
6.9133  
6.9104  
6.8945  
6.8915  
6.8670  
6.8641  
6.8467  
6.8437

— 3.9008

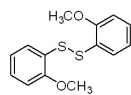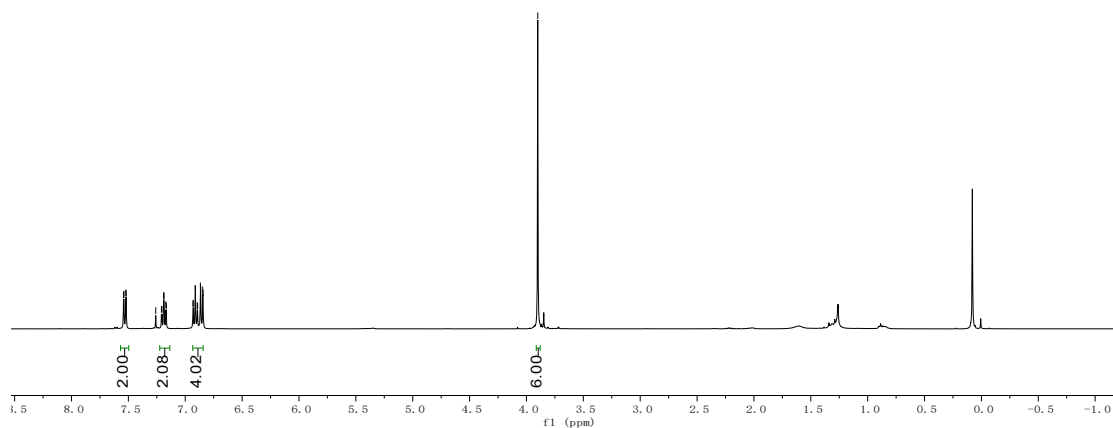

— 156.6052

127.7746  
127.5704  
124.5736  
121.3823

— 110.5044

— 55.9235

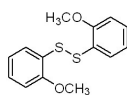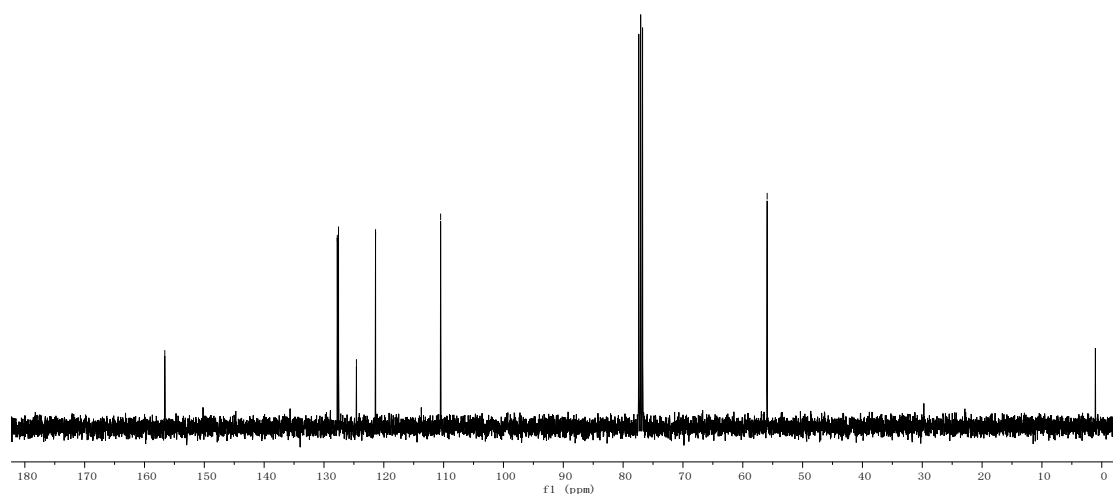

# 1,2-bis(4-ethylphenyl)disulfane (2g)

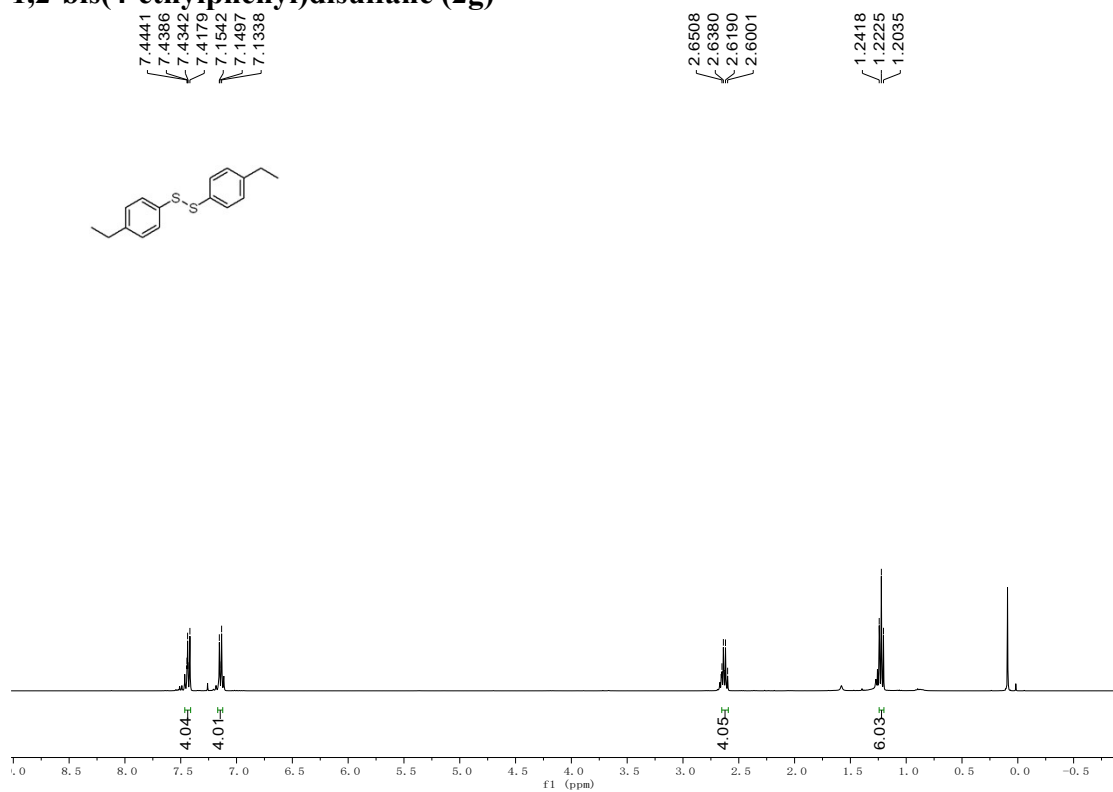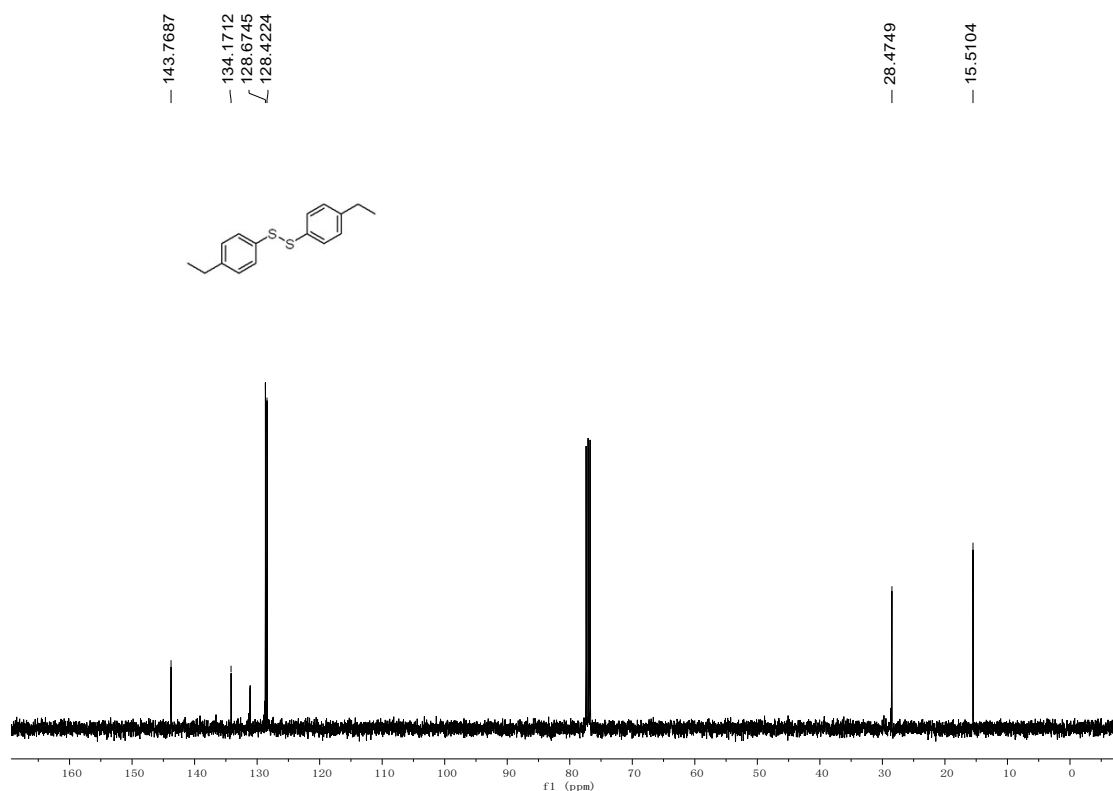

# 1,2-bis(4-isopropylphenyl)disulfane (2h)

7.4547  
7.4492  
7.4391  
7.4341  
7.2598  
7.2173  
7.1961  
7.1890  
7.1839  
7.1733  
7.1681  
7.1619  
7.1468

2.9255  
2.9188  
2.9081  
2.9013  
2.8909  
2.8838  
2.8735  
2.8562

1.2477  
1.2305

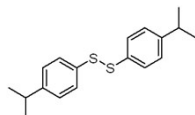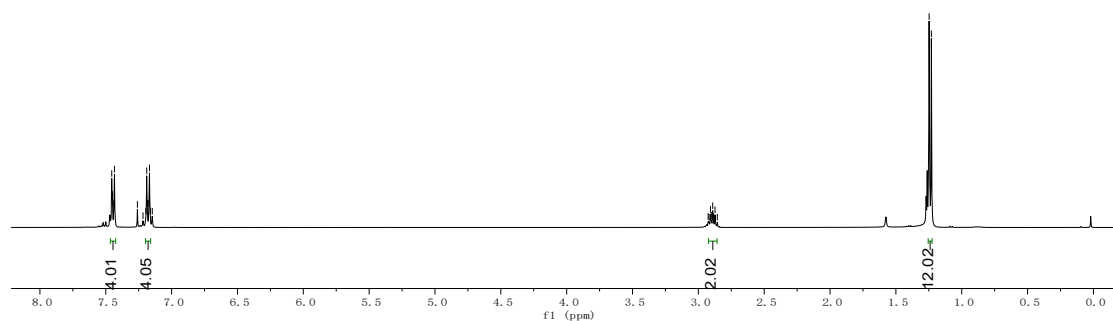

148.3405

131.1022  
128.2405  
127.2597

33.7665

23.9256

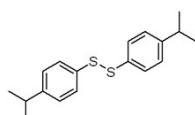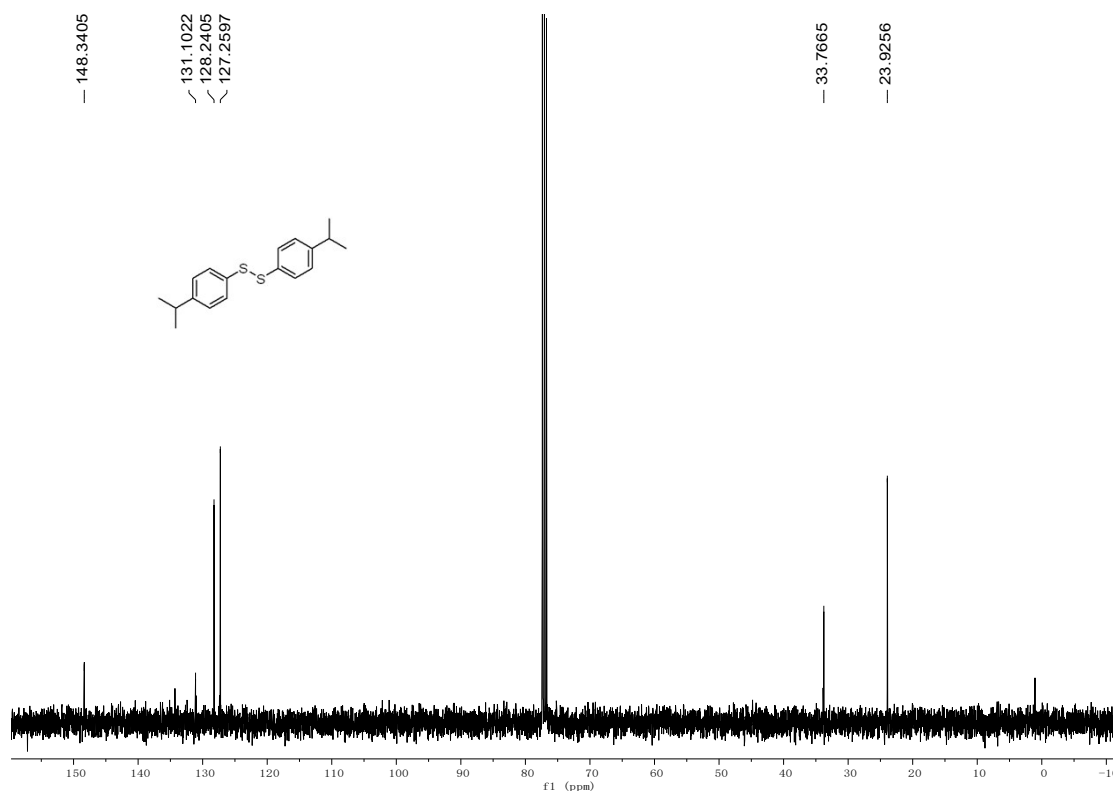

# 1,2-bis(4-(*tert*-butyl)phenyl)disulfane (2i)

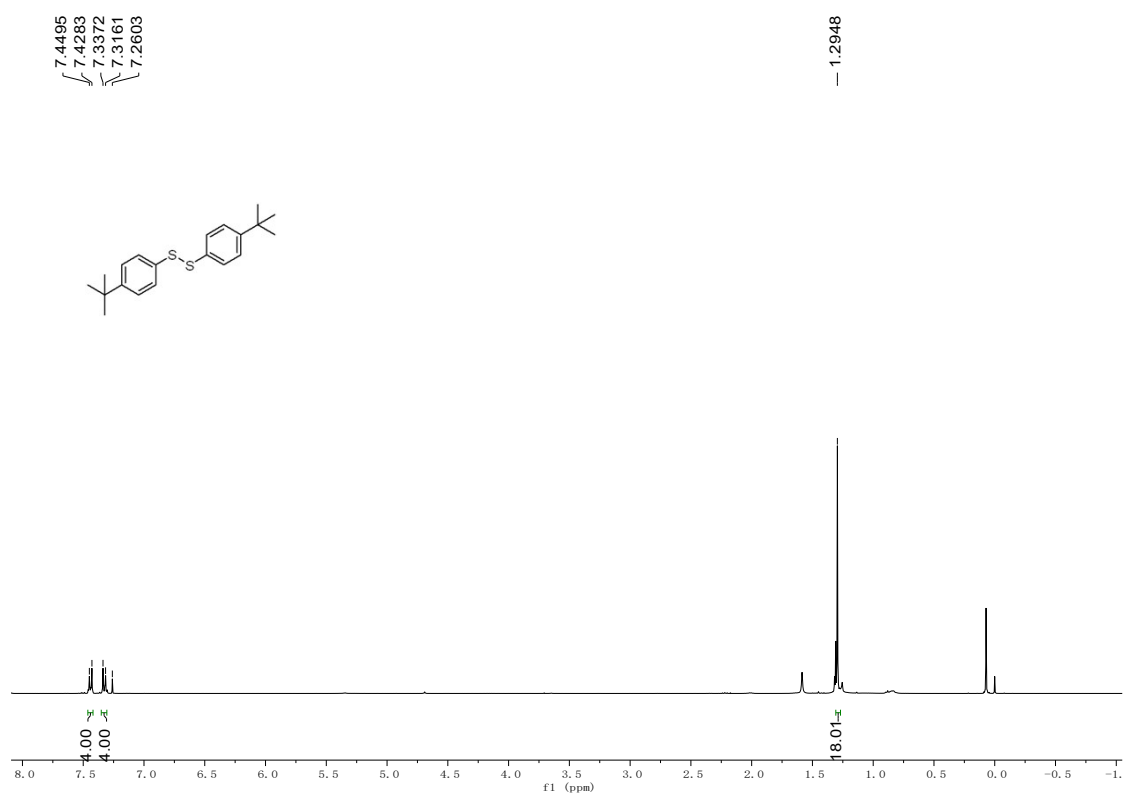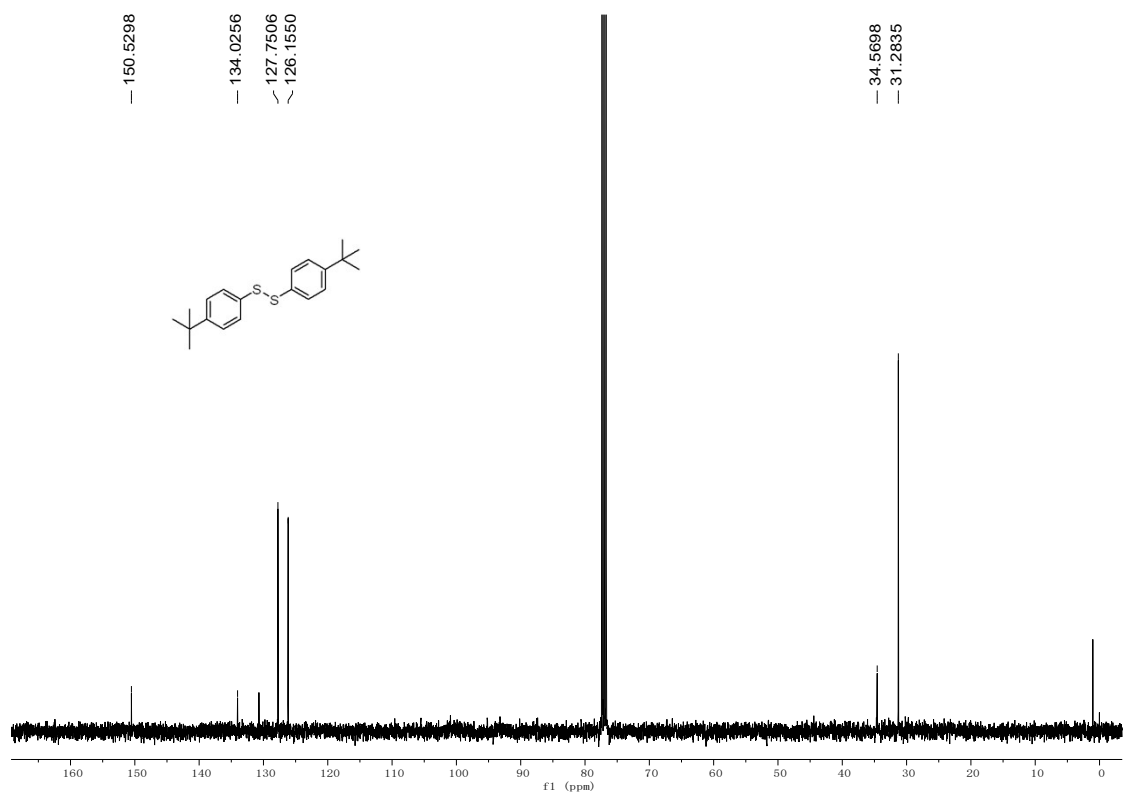

# 1,2-bis(4-fluorophenyl)disulfane (2j)

7.5196  
7.5142  
7.5062  
7.4978  
7.4849  
7.4593  
7.4466  
7.4421  
7.4374  
7.4247  
7.2597  
7.0301  
7.0083  
7.0025  
6.9924  
6.9865  
6.9646

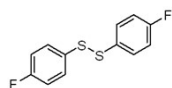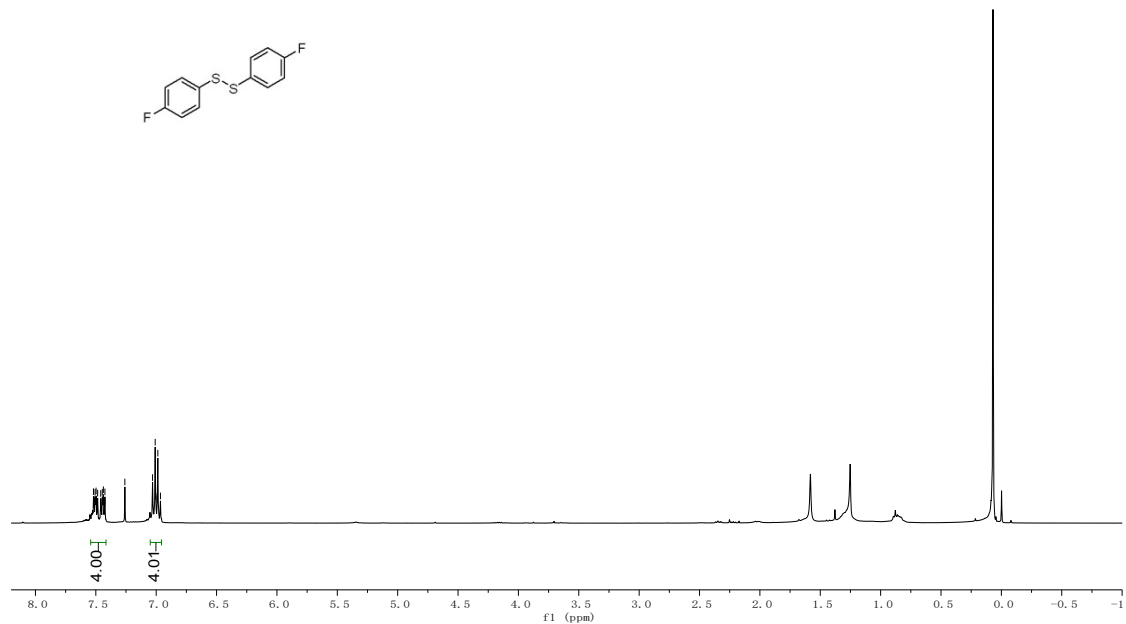

163.8761  
161.4115  
132.2067  
132.1771  
131.3486  
131.2677  
116.4334  
116.2158

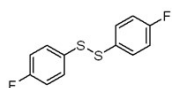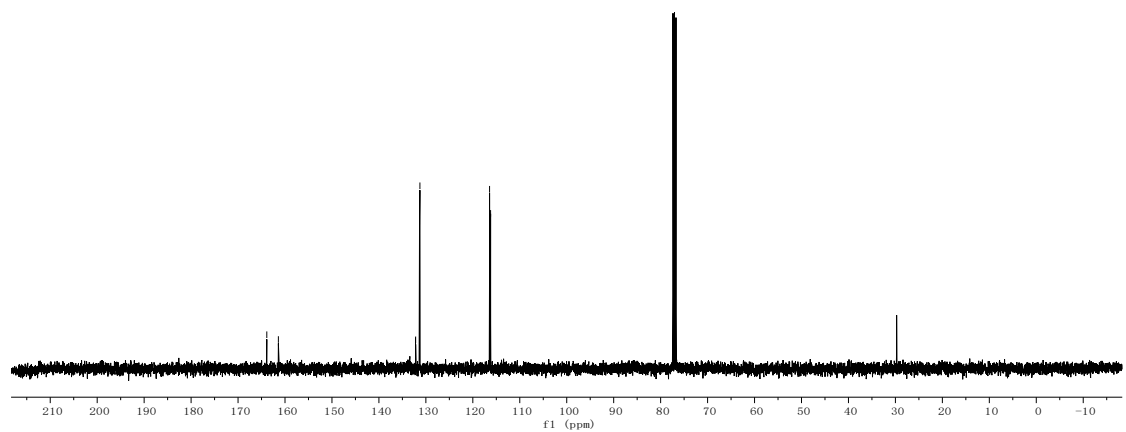

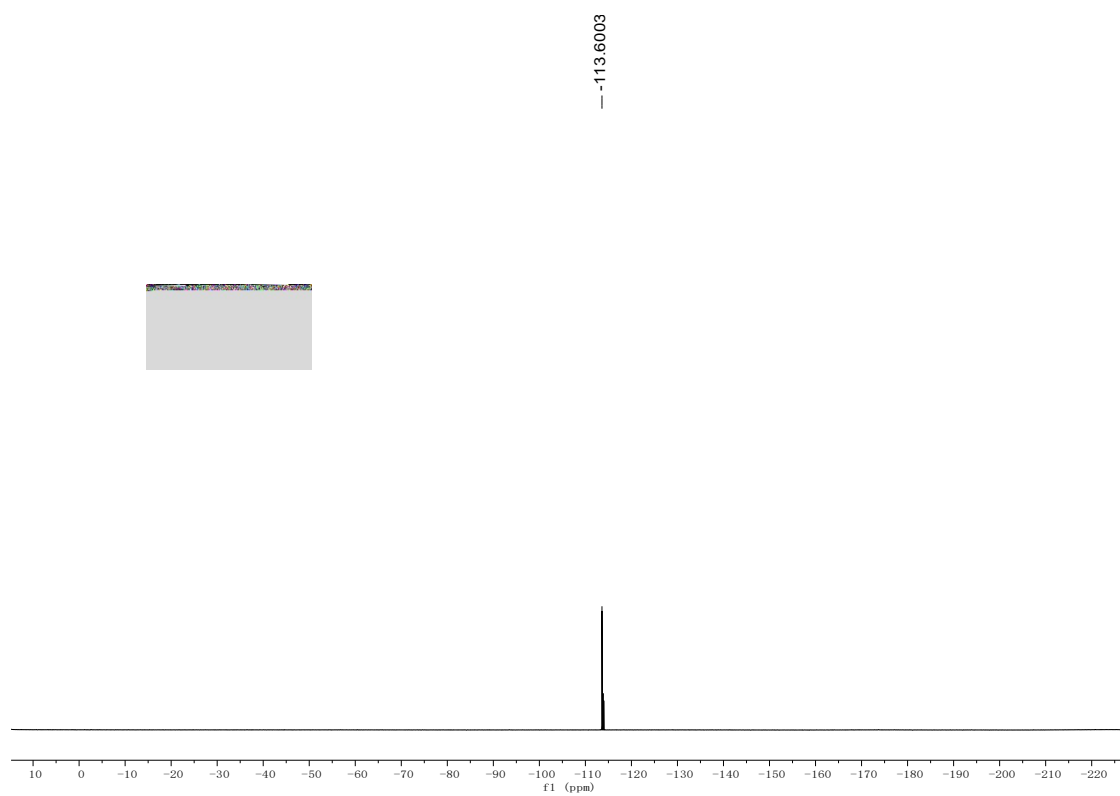

# 1,2-bis(4-chlorophenyl)disulfane (2k)

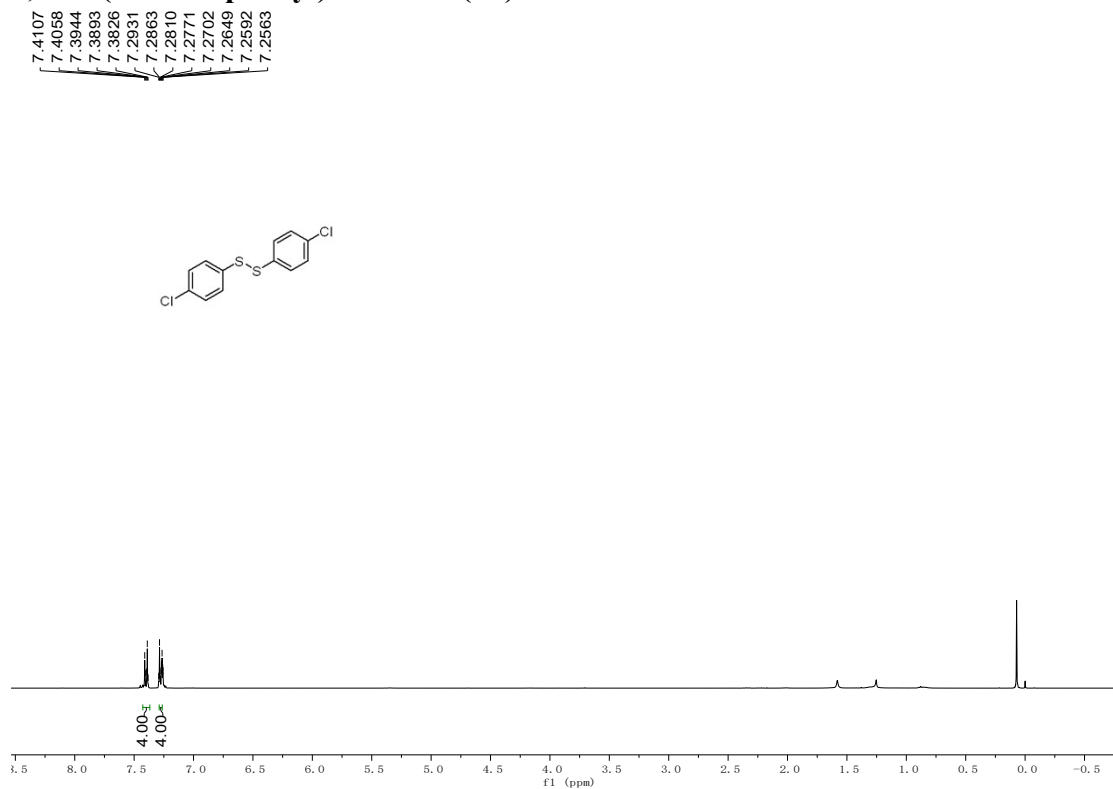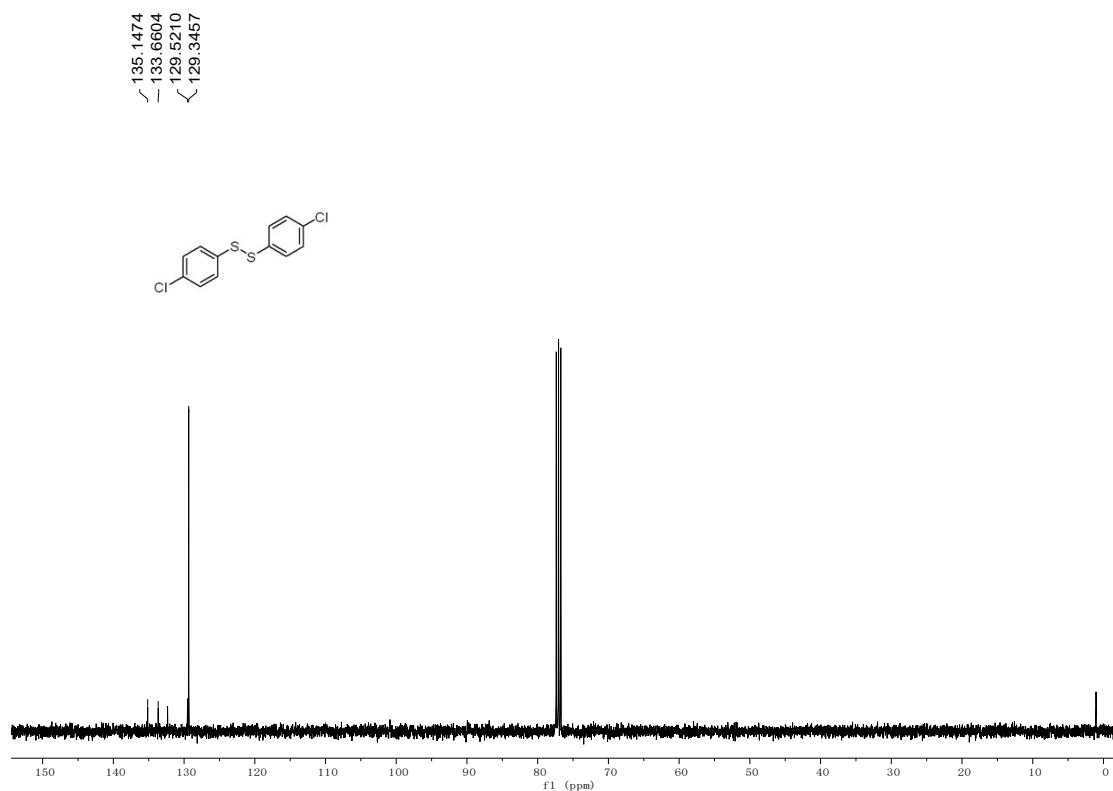

# 1,2-bis(4-bromophenyl)disulfane (2l)

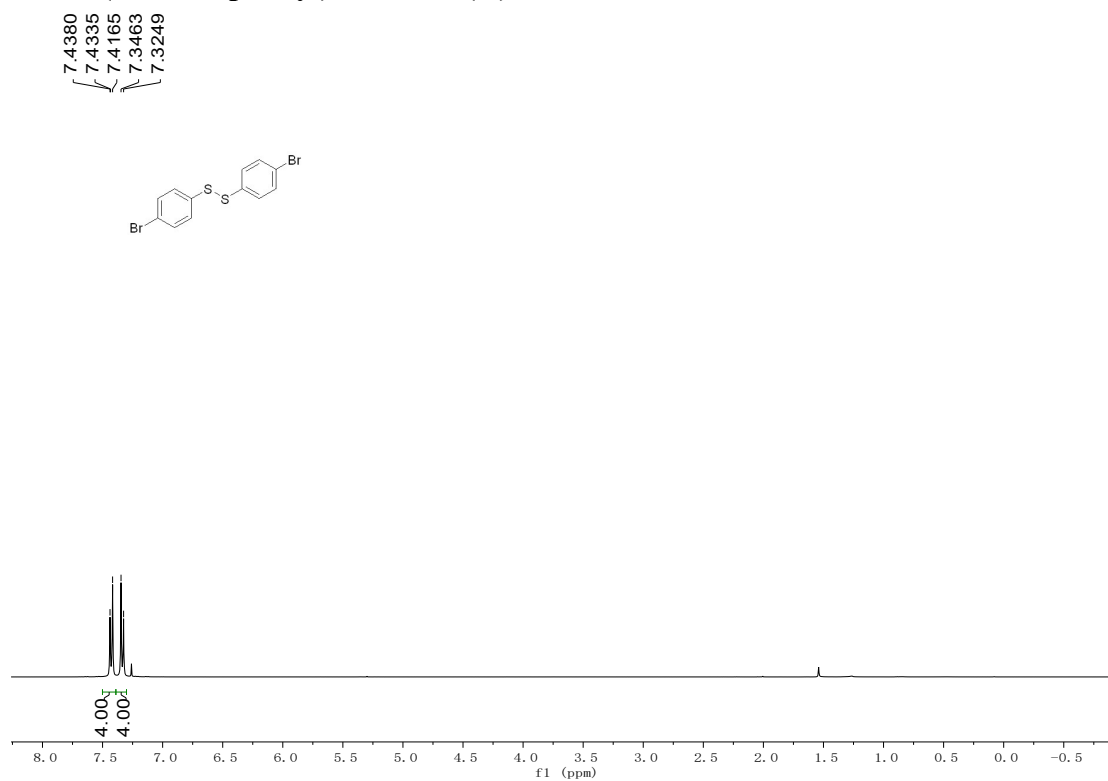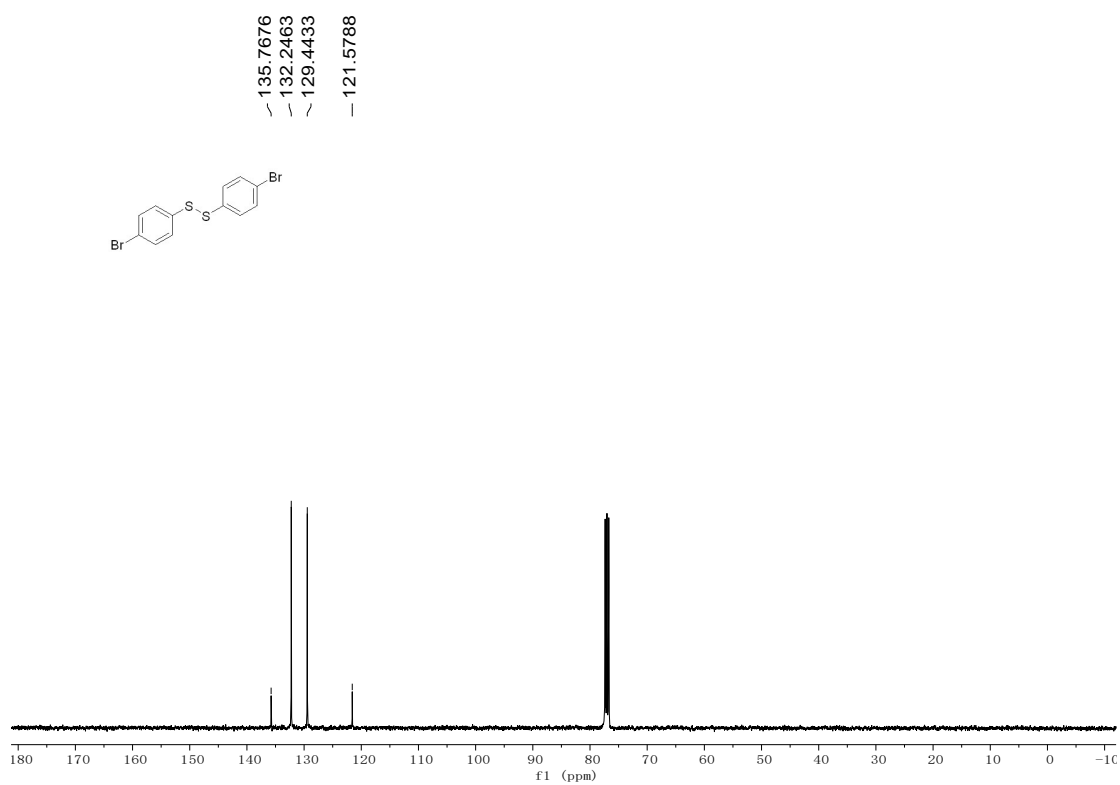

# 1,2-bis(3-fluorophenyl)disulfane (2m)

7.3480  
7.3407  
7.3092  
7.2955  
7.2892  
7.2828  
7.2761  
7.2704  
7.2614  
7.2559  
7.2514  
7.2380  
7.2332  
7.2198  
7.2130  
6.9881  
6.9716  
6.9657  
6.9501  
6.9446  
6.9284  
6.9096  
6.9041

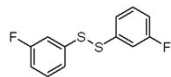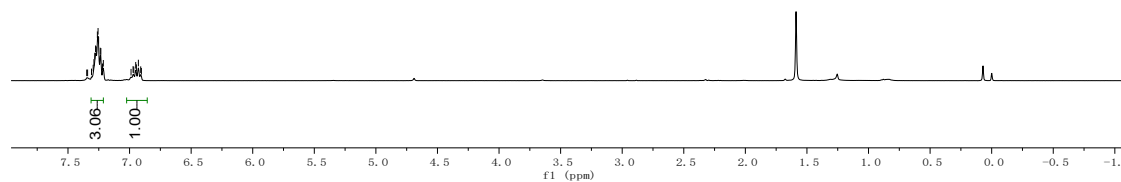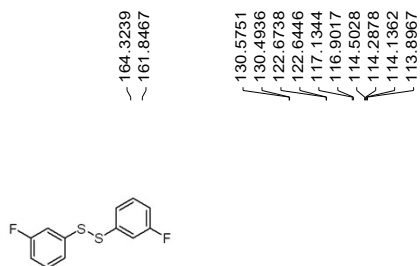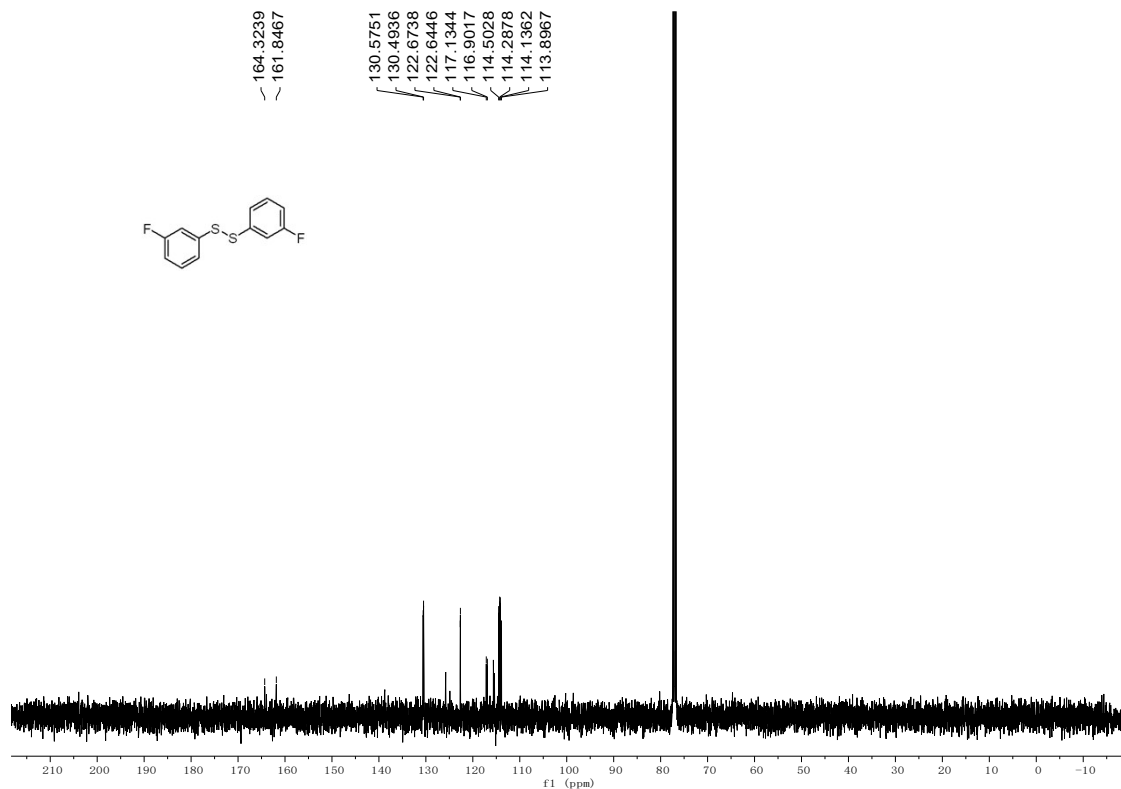

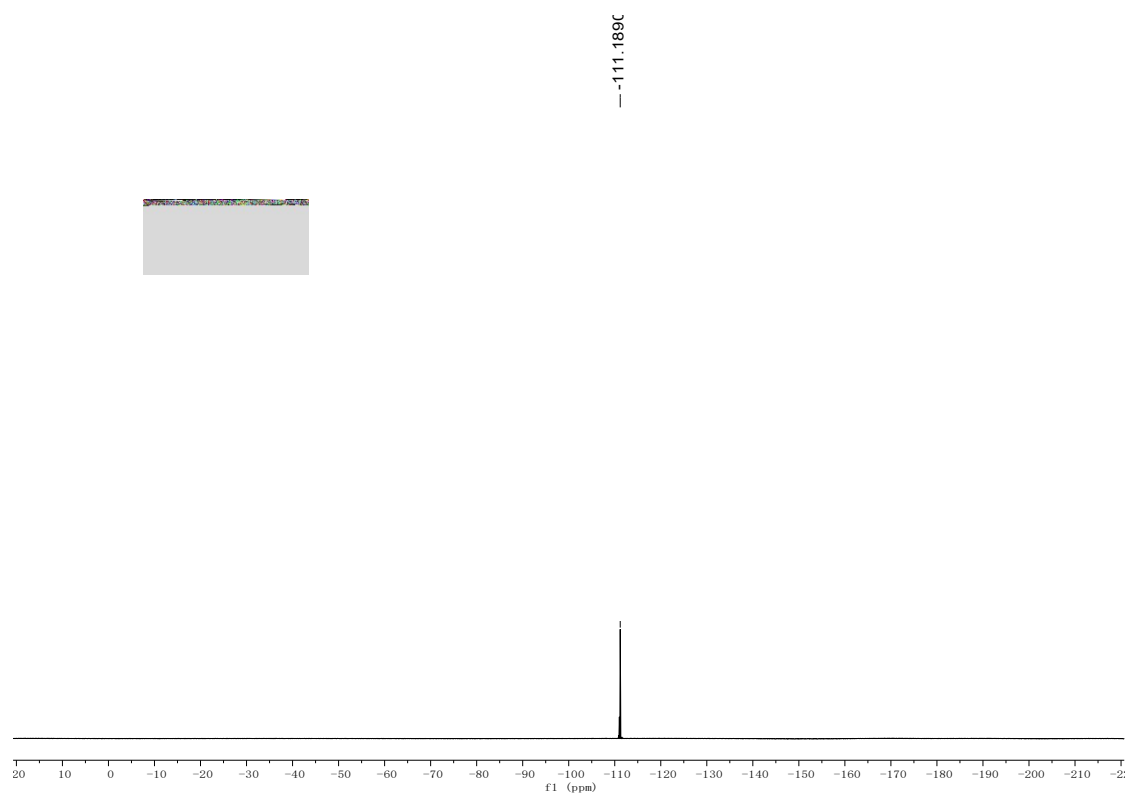

# 1,2-bis(3-chlorophenyl)disulfane (2n)

7.5053  
7.5003  
7.4958  
7.3887  
7.3844  
7.3802  
7.3706  
7.3660  
7.3617  
7.3439  
7.3412  
7.2888  
7.2845  
7.2724  
7.2695  
7.2513  
7.2490  
7.2440  
7.2398  
7.2242

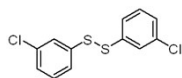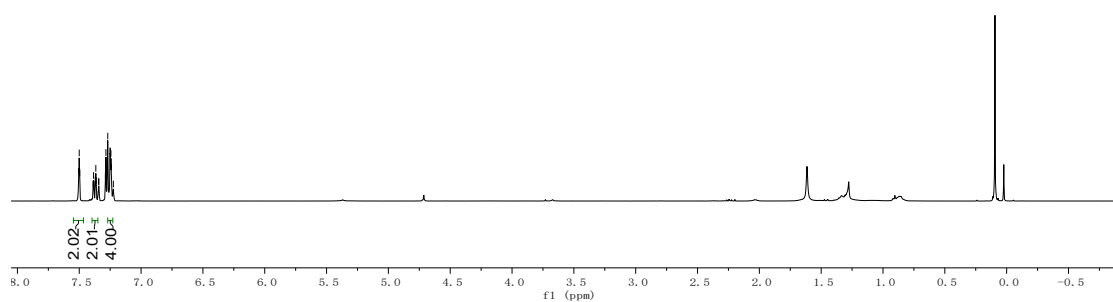

138.4022  
135.1529  
130.2526  
127.5991  
127.0063  
125.3489

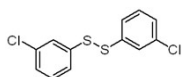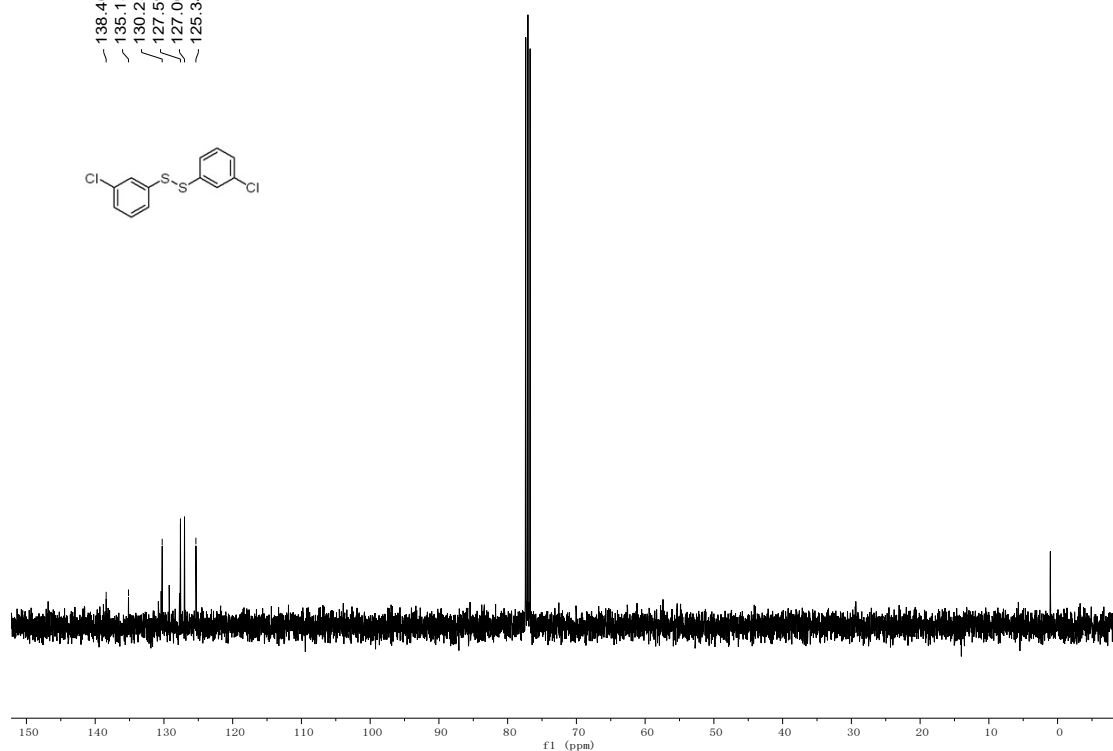

# 1,2-bis(4-(trifluoromethyl)phenyl)disulfane (2o)

— 7.5771

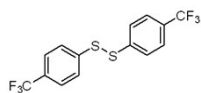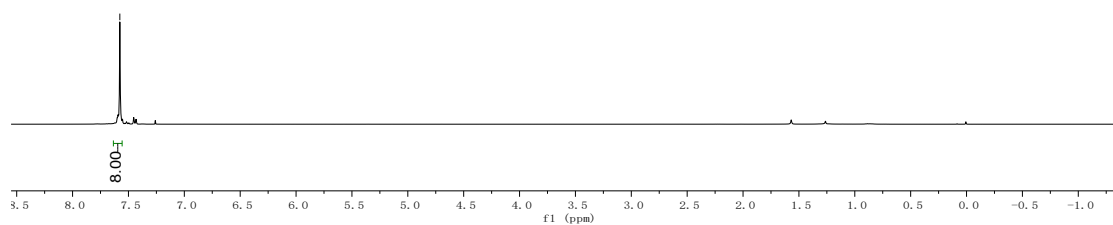

140.8134  
131.0368  
129.8376  
129.5991  
129.2744  
129.0286  
126.5756  
126.2163  
126.1772  
126.1404  
126.1036  
125.2293  
122.5229

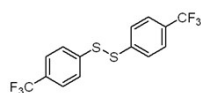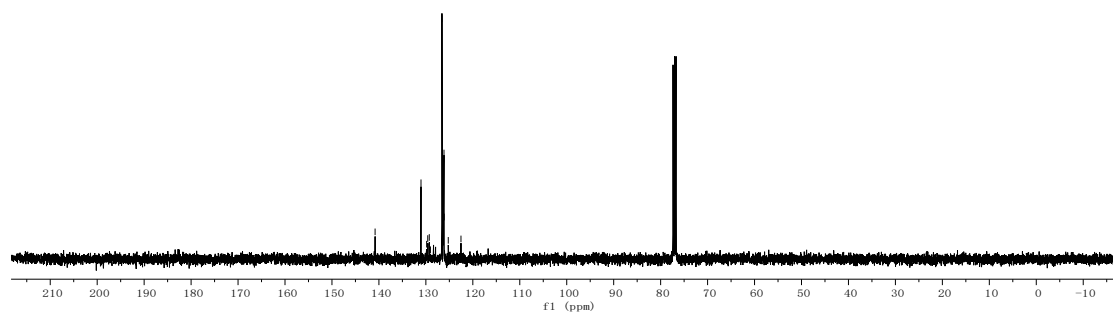

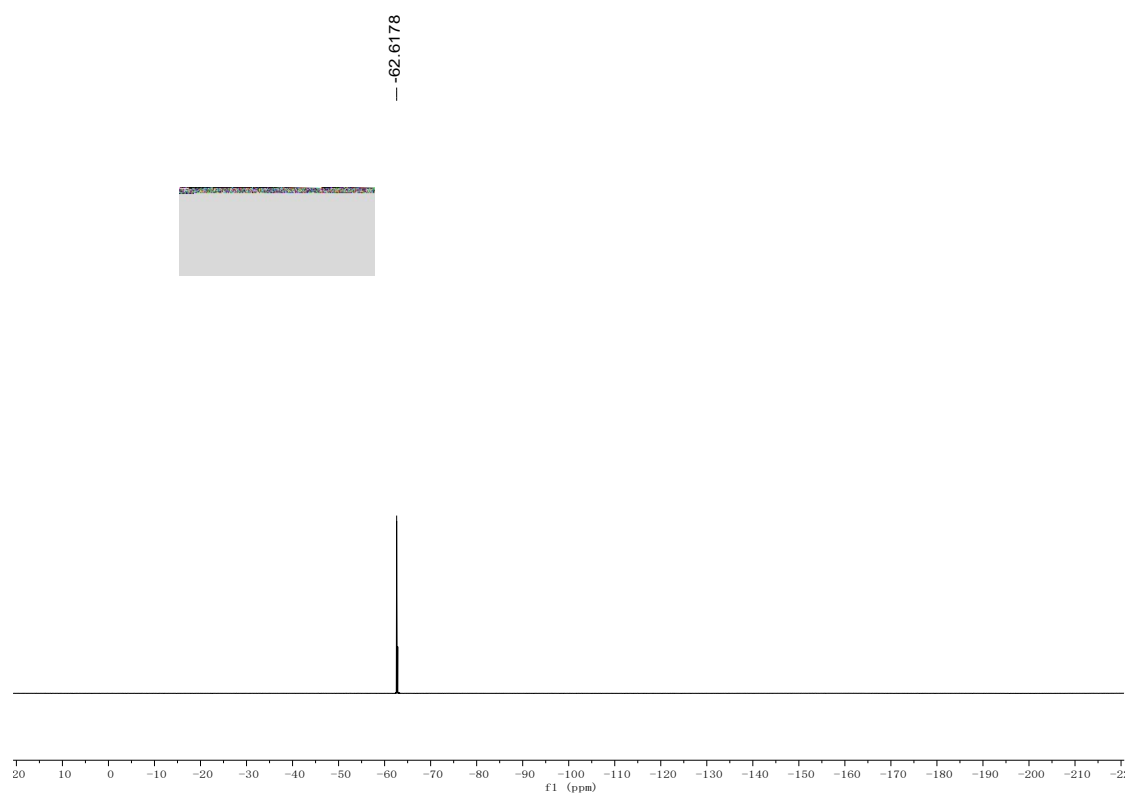

# 1,2-bis(4-(trifluoromethoxy)phenyl)disulfane (2p)

7.5395  
7.5174  
7.5109  
7.2020  
7.1811

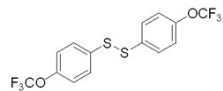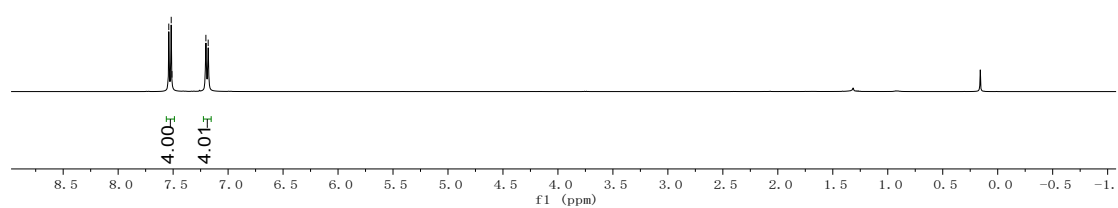

148.7445  
135.2316  
129.2986  
124.2945  
121.7054  
119.1722  
116.6113

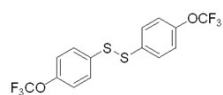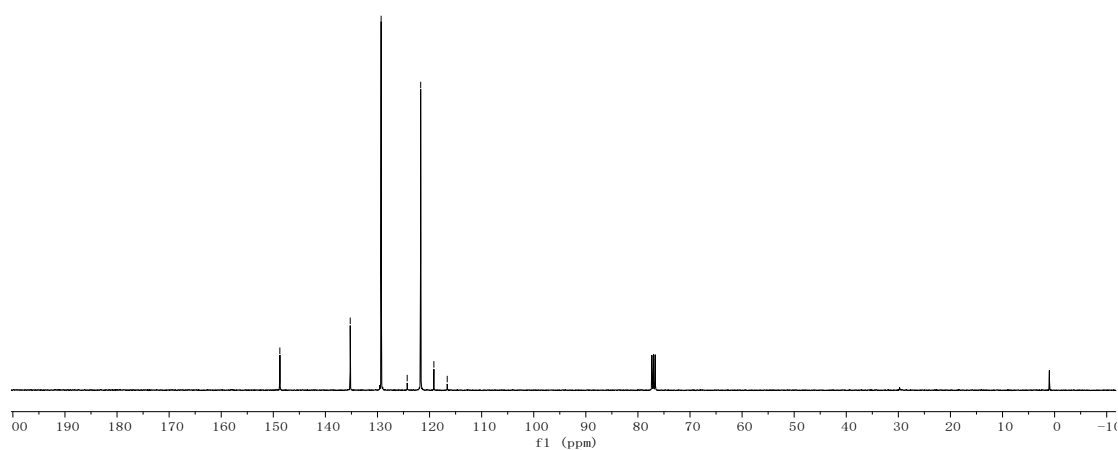

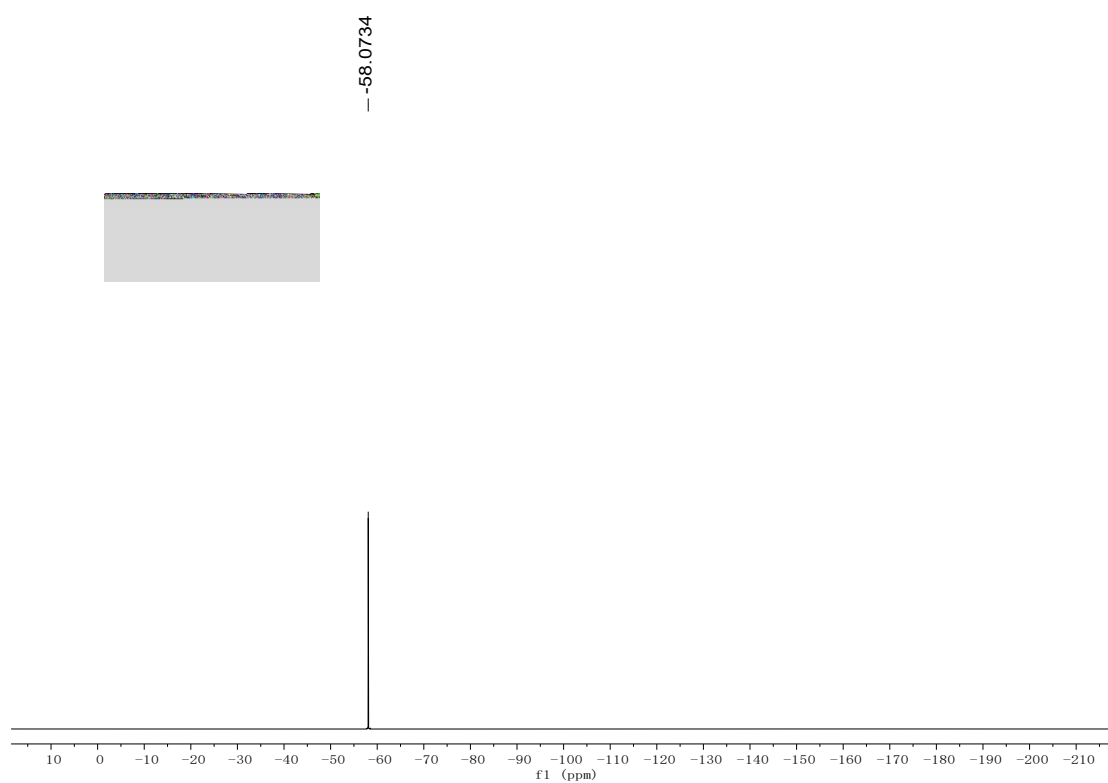

# 1,2-di([1,1'-biphenyl]-4-yl)disulfane (2q)

7.6330  
7.6280  
7.6173  
7.6117  
7.6067  
7.5963  
7.5923  
7.5875  
7.5853  
7.5801  
7.5748  
7.5722  
7.5639  
7.5589  
7.4735  
7.4550  
7.4509  
7.4394  
7.4355  
7.3863  
7.3682  
7.2846

— 1.6147

— 0.0232

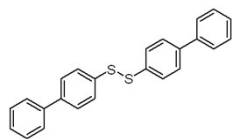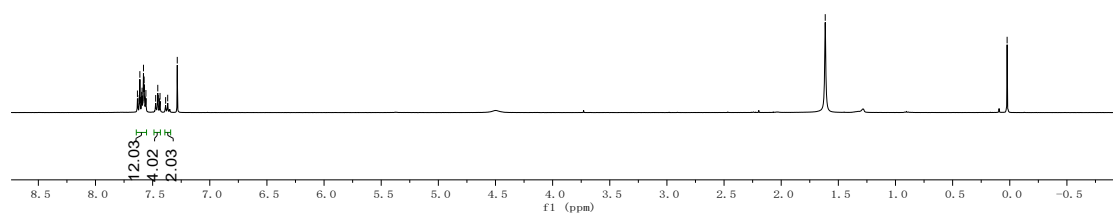

140.3982  
140.2300  
136.0481  
128.8782  
128.2356  
127.8318  
127.5633  
127.0007

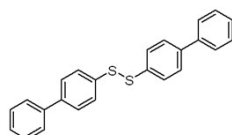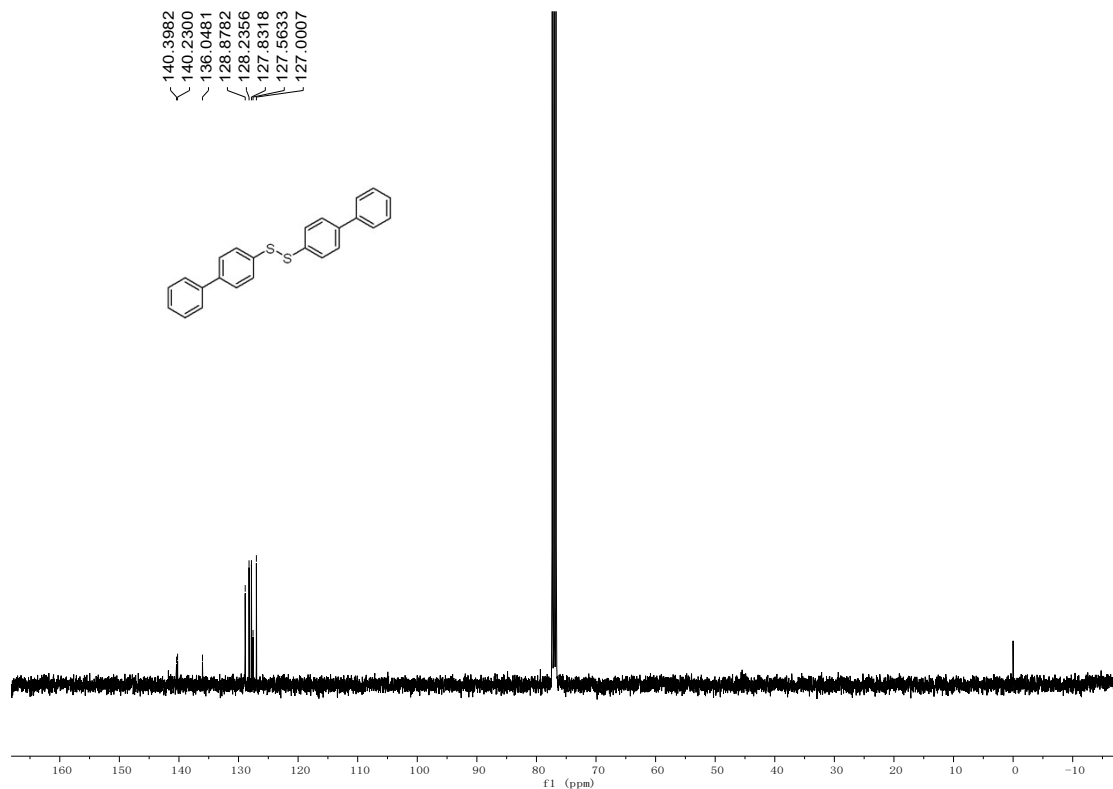

# 1,2-bis(3,5-dimethylphenyl)disulfane (2r)

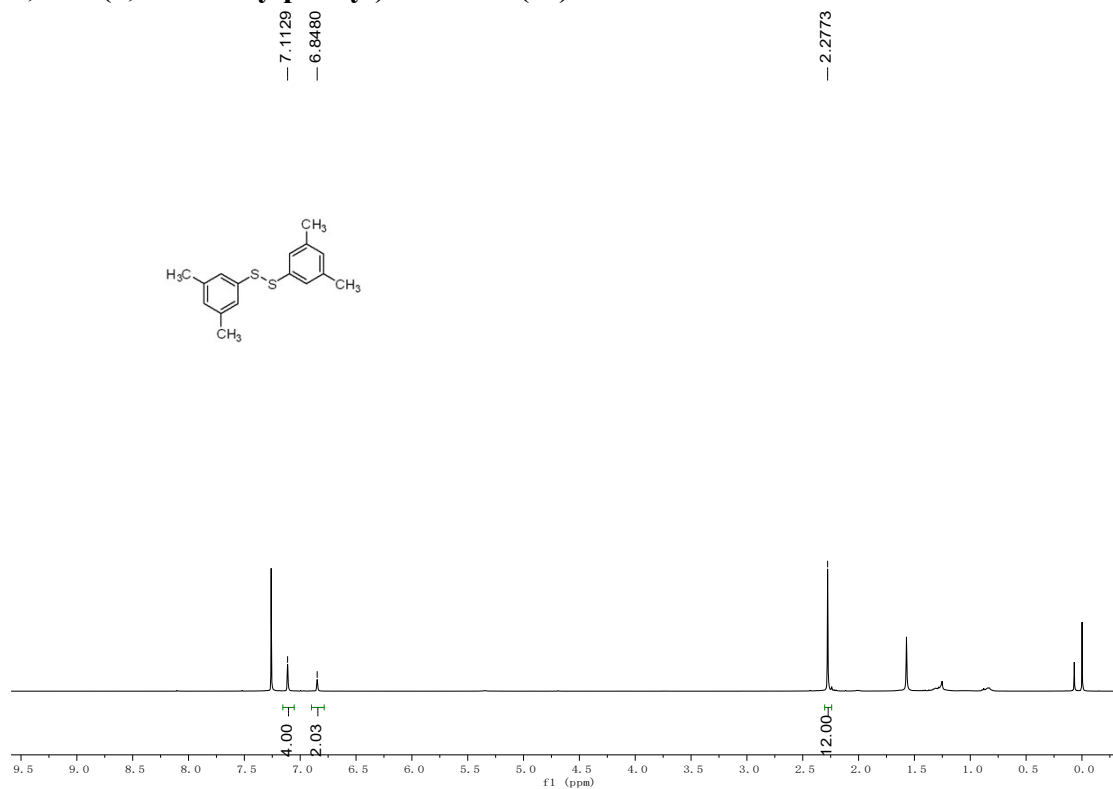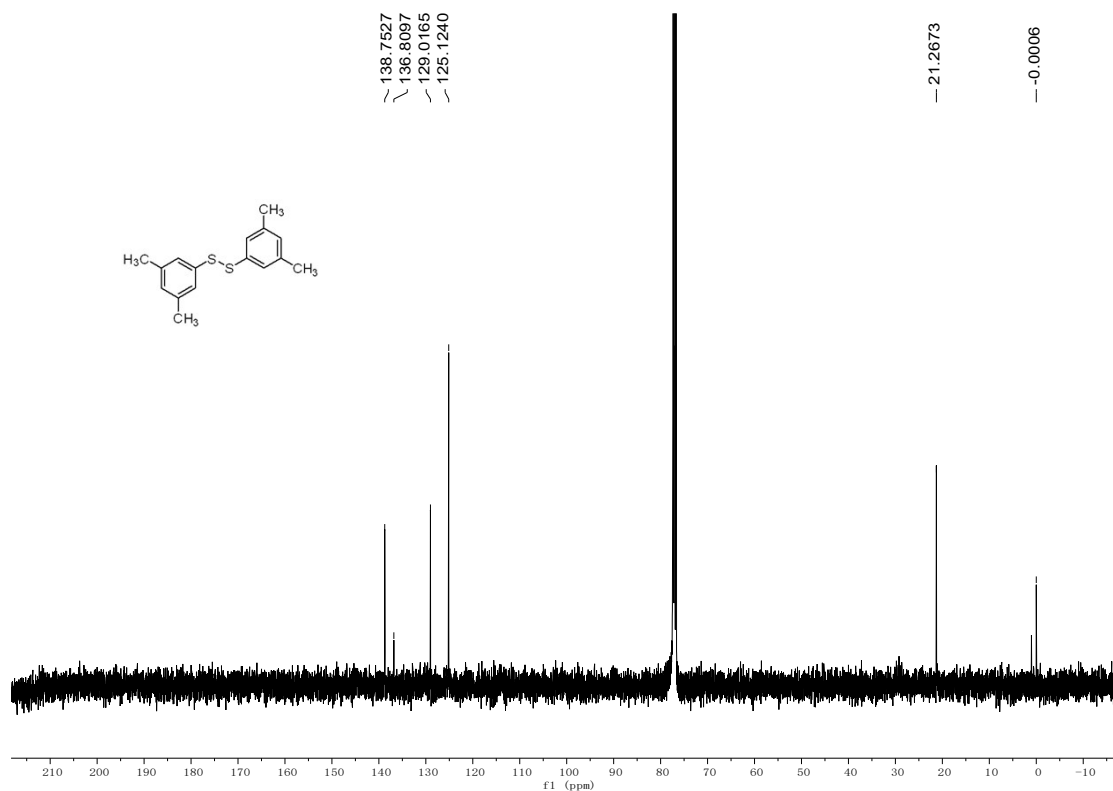

# 1,2-bis(3,5-dimethoxyphenyl)disulfane (2s)

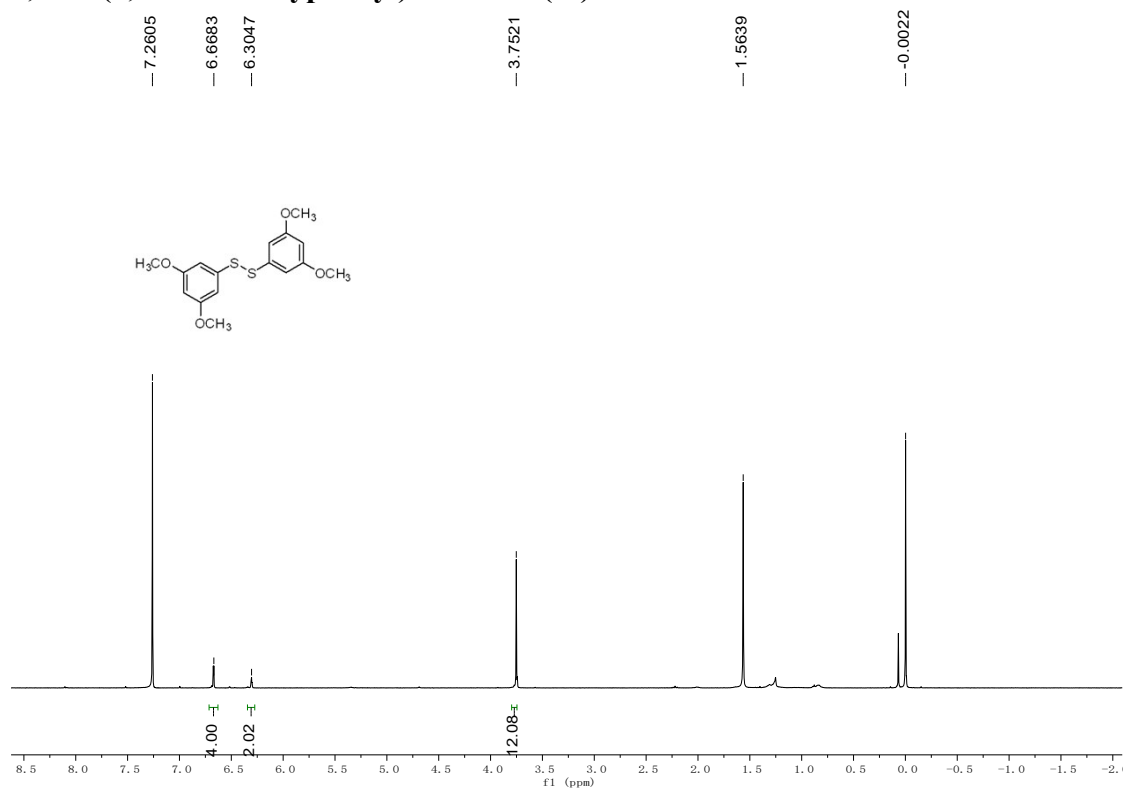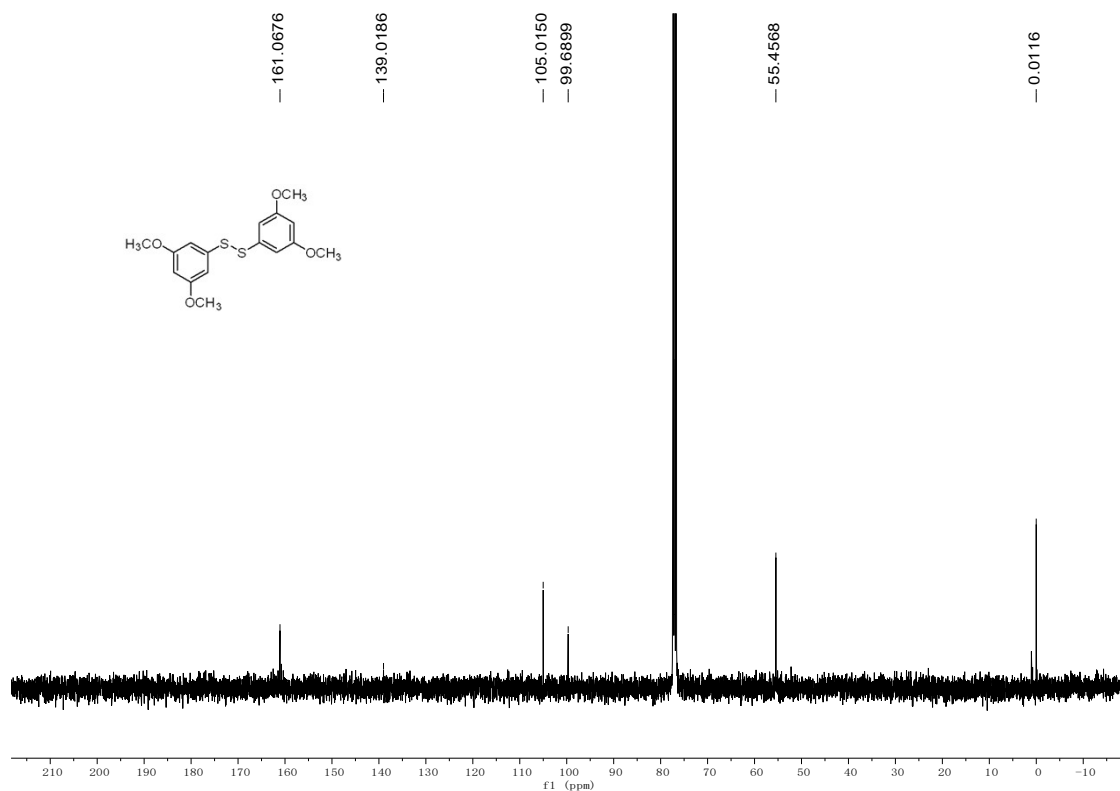

# 1,2-bis(3,4-dimethylphenyl)disulfane (2t)

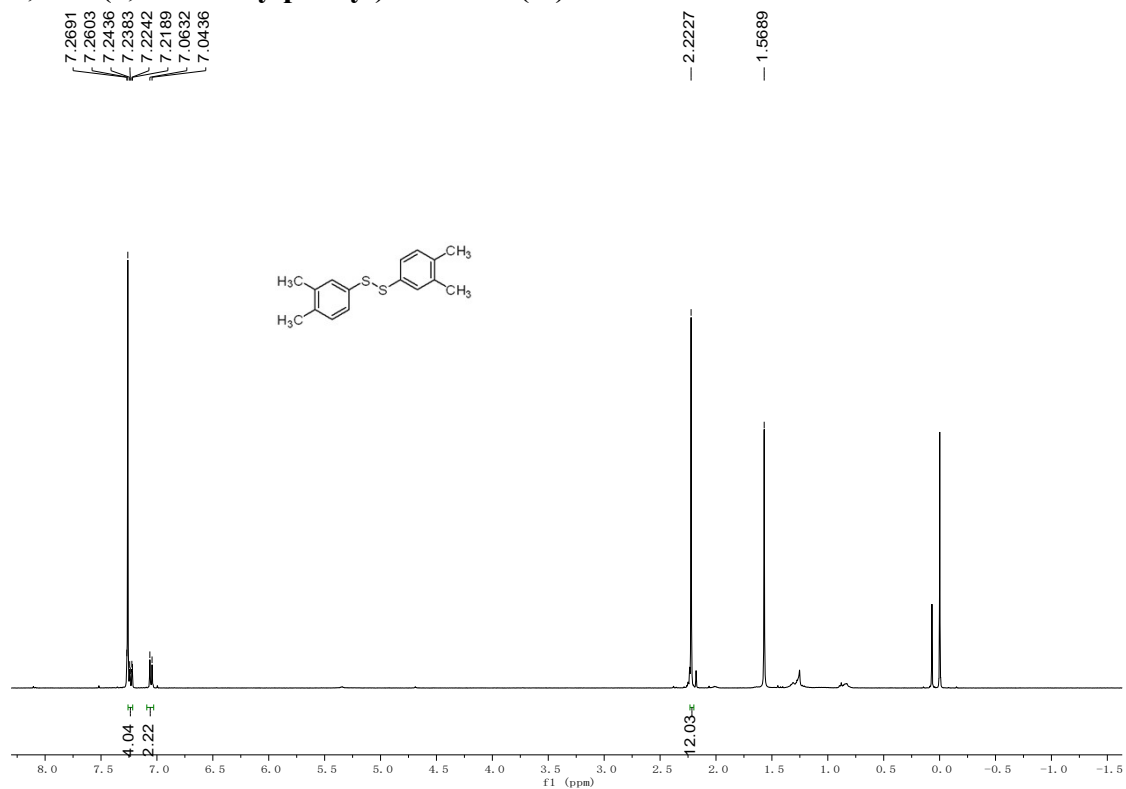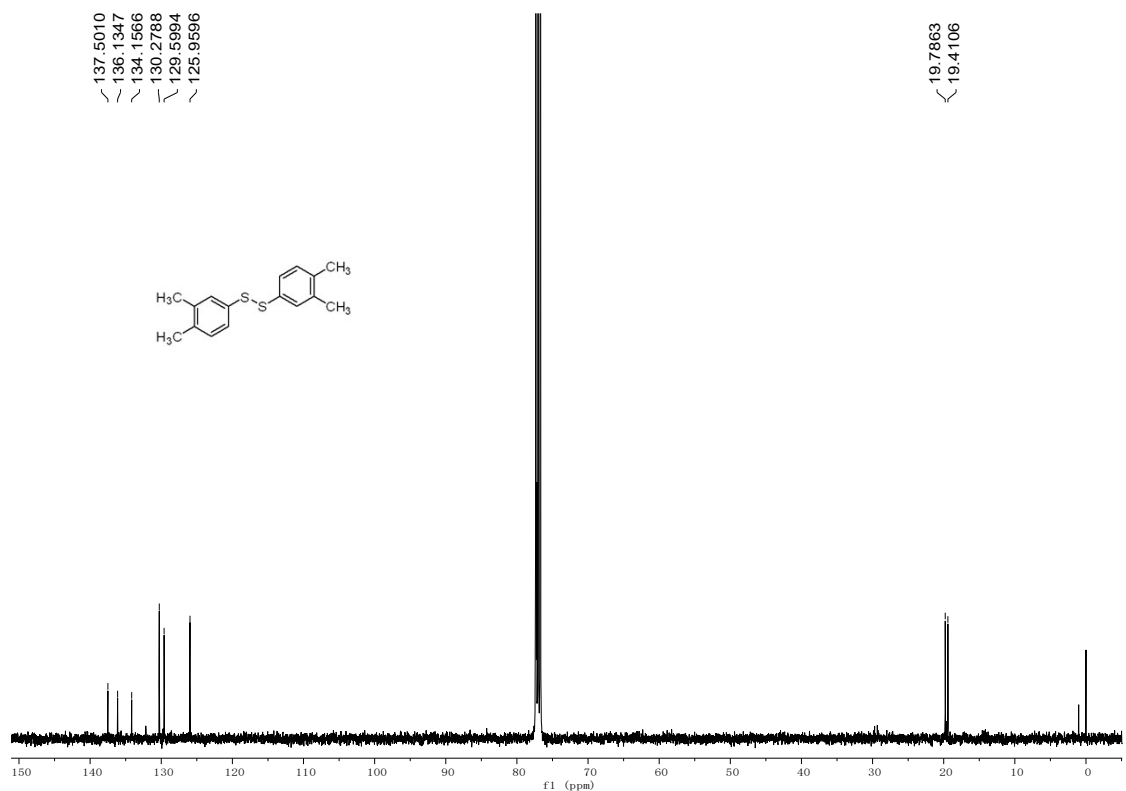

# 1,2-dimesityldisulfane (2u)

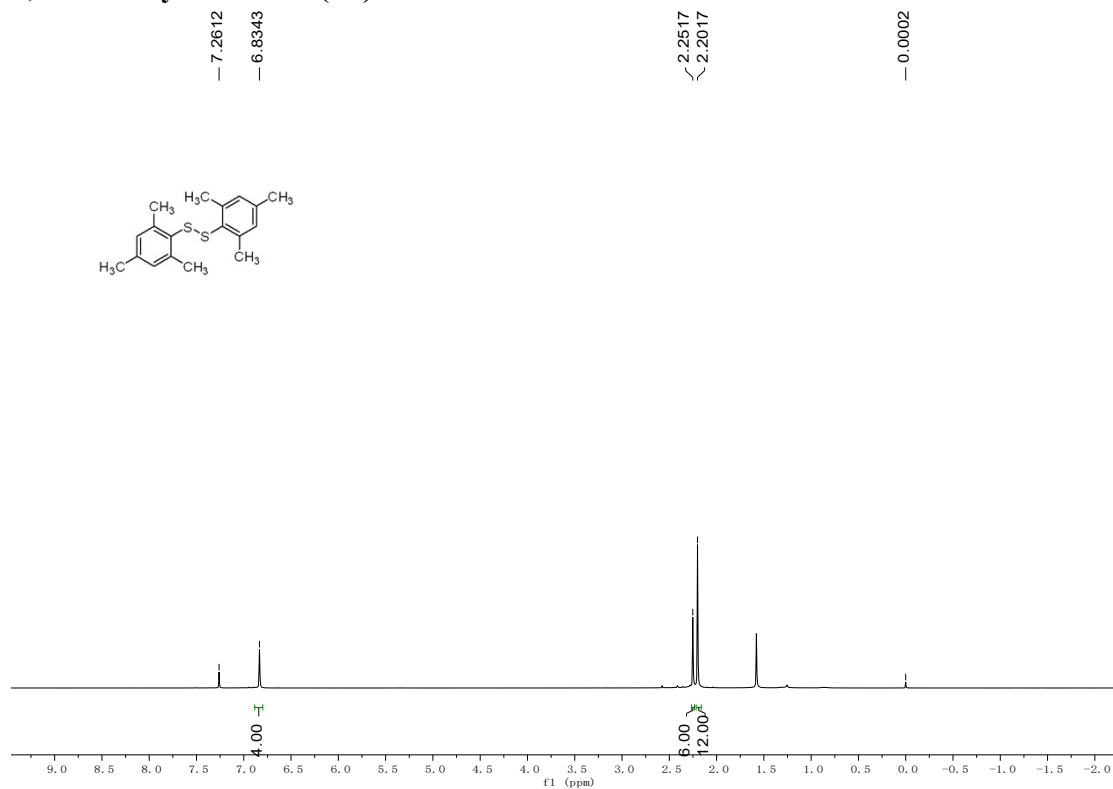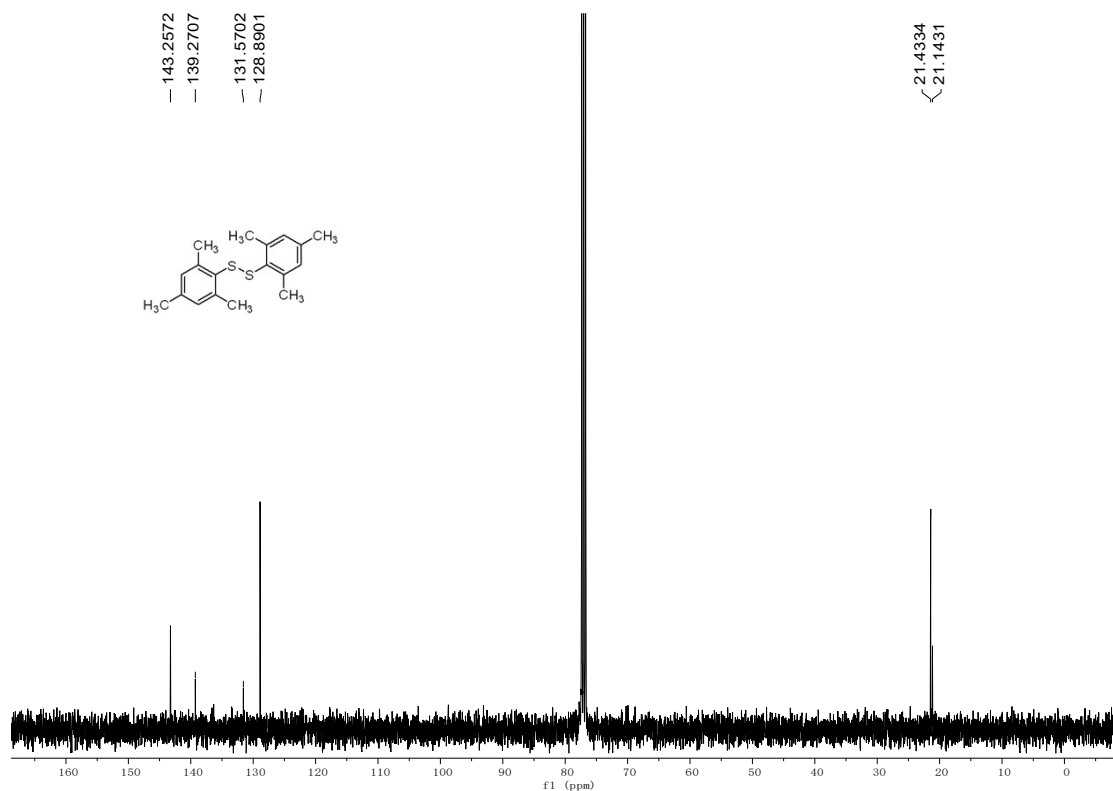

## References

- (1) K.M. Rajesha, B. Ajithaa, Ashok Kumar Reddyb, Y., Suneethac, Y., Sreedhara Reddy, P. *Materials Today: Proceedings* **2016**, 3, 1985
- (2) A. M. Sipyagin, V. S. Enshov, S. A. Kashtanov, V. A. Potemkin, J. S. Thrasher, A. Waterfeld. *Russian Chemical Bulletin, International Edition*, 2004, 53, 420-434.
- (3) X. Qiu, X. Yang, Y. Zhang, S. Song, N. Jiao. *Org. Chem. Front.*, **2019**, 6, 2220–2225.
- (4) C. Bottecchia, N. Erdmann, P. M. A. Tijssen, L. Milroy, L. Brunsveld, V. Hessel, T. Noûl. *ChemSusChem*, **2016**, 9, 1781 – 1785.
- (5) F. Zhu, E. Miller, S. Zhang, D. Yi, S. O'Neill, X. Hong, M. A. Walczak. *J. Am. Chem. Soc.* **2018**, 140, 18140–18150.
- (6) S. C. Banfield, A. T. Omori, H. Leisch, T. Hudlicky. *J. Org. Chem.* **2007**, 72, 4989-4992.
- (7) M. Hayashi, K. Okunaga, S. Nishida, K. Kawamura, K. Eda. *Tetrahedron Letters* **2010**, 51, 6734 – 6736.
- (8) L. Song, W. Li, W. Duan, J. An, S. Tang, L. Li, G. Yang. *Green Chem.*, **2019**, 21, 1432–1438.
- (9) K. Nishino, S. Tsukahara, Y. Ogiwara, N. Sakai. *Eur. J. Org. Chem.* **2019**, 1588-1593.
- (10) J. Howard, C. Schotten, S. Alston· D. Browne. *Chem. Commun.*, **2016**, 52, 8448-8451.
- (11) J. Leng, S. Wang, H. Qin. *Beilstein J. Org. Chem.* **2017**, 13, 903–909.\
- (12) G. Martino, M. Edler, G. Regina, A. Coluccia, M. Barbera, D. Barrow, R. Nicholson, G. Chiosis, A. Brancale, E. Hamel, M. Artico, R. Silvestri. *J. Med. Chem.* **2006**, 49, 947-954.
- (13) S. Dharmarathna, C. King'ondou, L. Pahalagedara, C. Kuo, Y. Zhang, S. L. Suib. *Applied Catalysis B: Environmental*, **2014**, 147, 124-131.
- (14) R. Tata, C. Hampton, M. Harmata. *Adv. Synth. Catal.* **2017**, 359, 1232-1241.
